# Supplementary material for: Unexpected Ancient Paralogs and an Evolutionary Model for the COPII Coat Complex
Source: PubMed Central journal article supplement (PMC4419792; doi:10.1093/gbe/evv045), 2015-03-05
Supplement: supp_evv045_Schlacht_Dacks_SupplFiguresS1-24.pdf [file supp_evv045_Schlacht_Dacks_SupplFiguresS1-24.pdf]

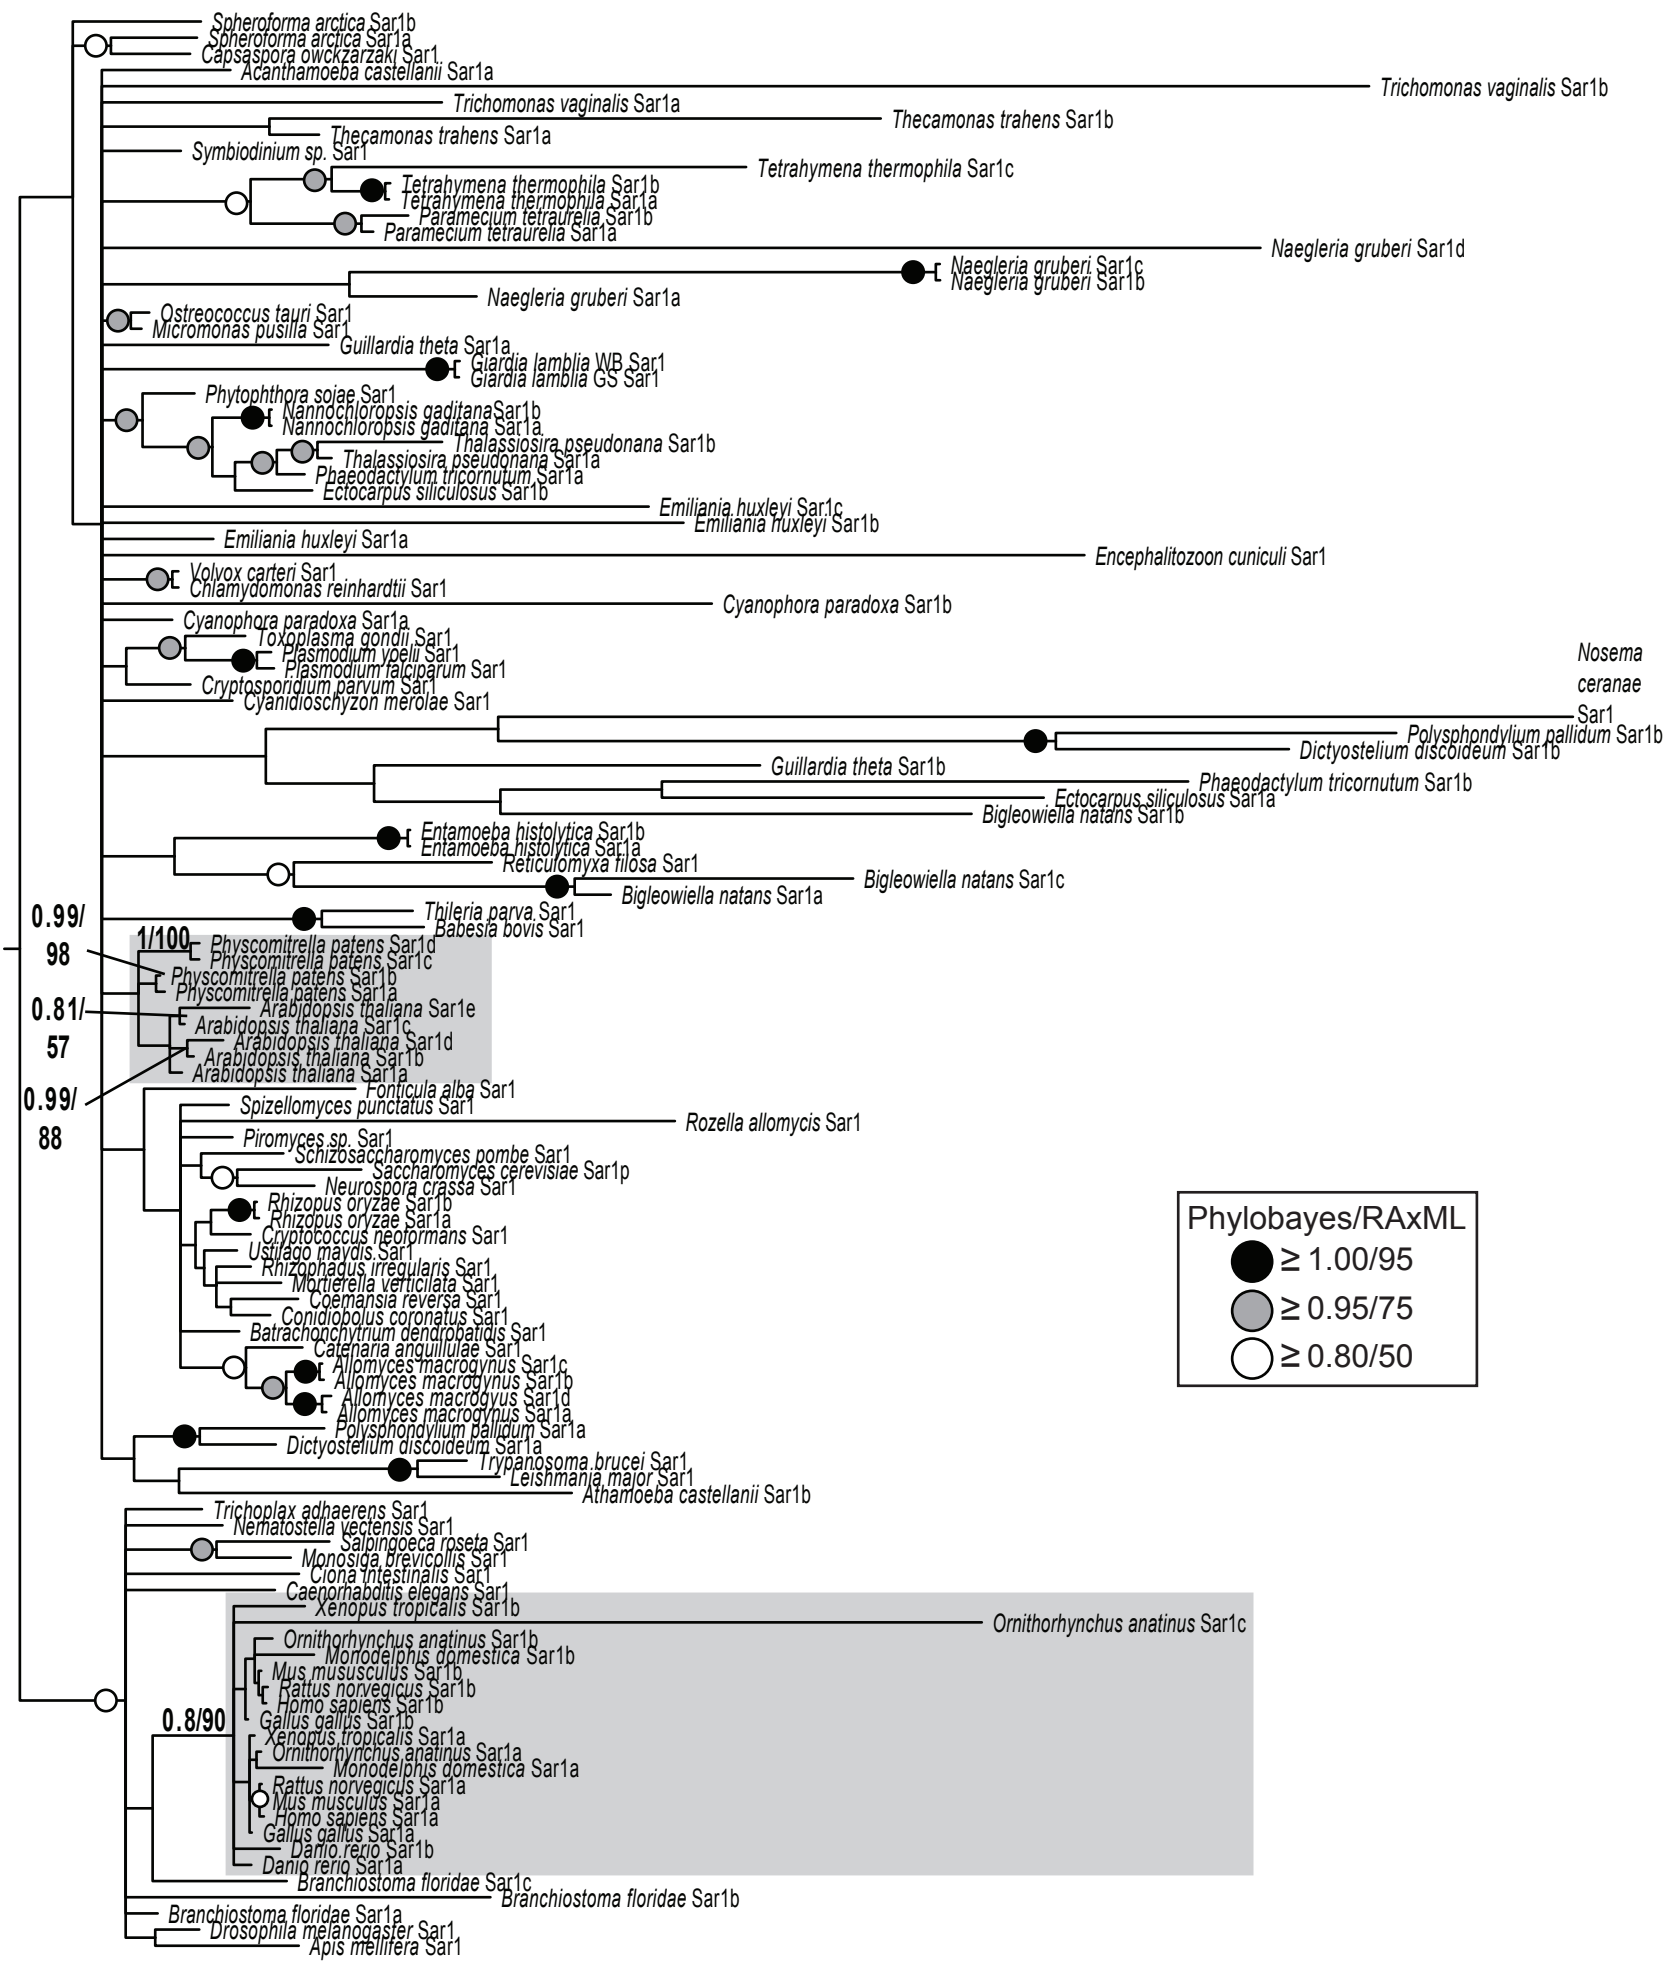

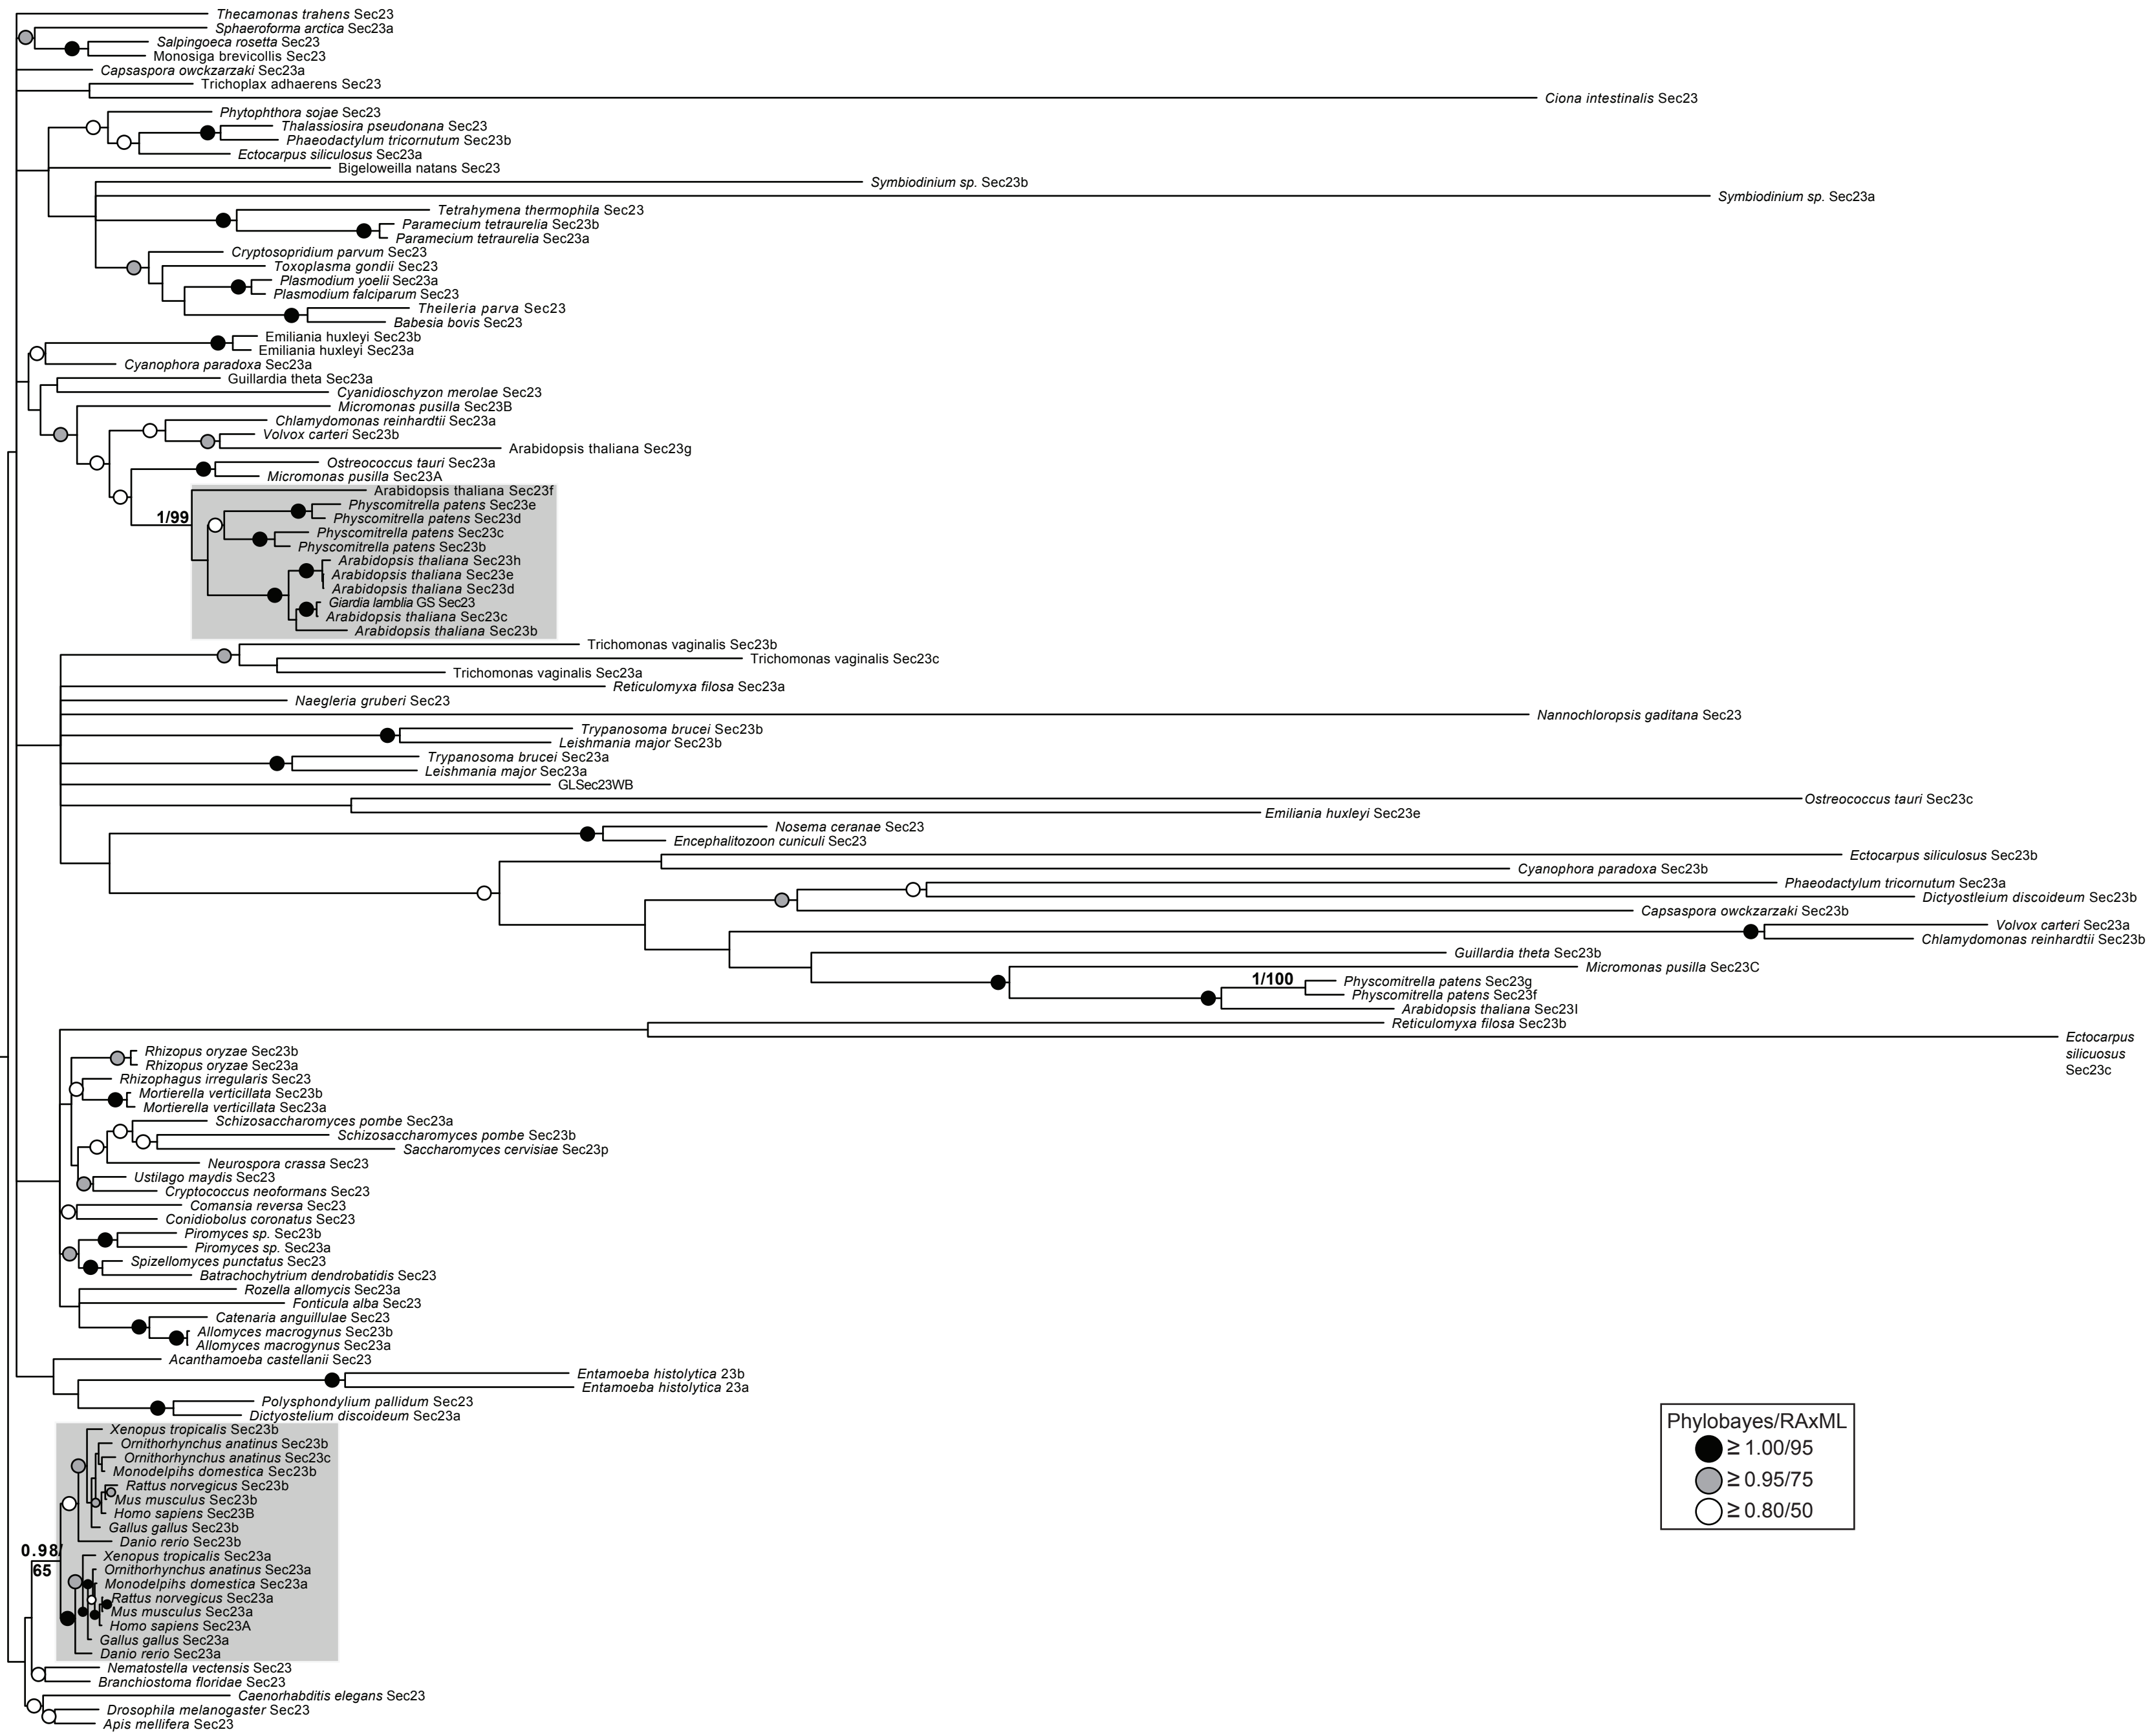

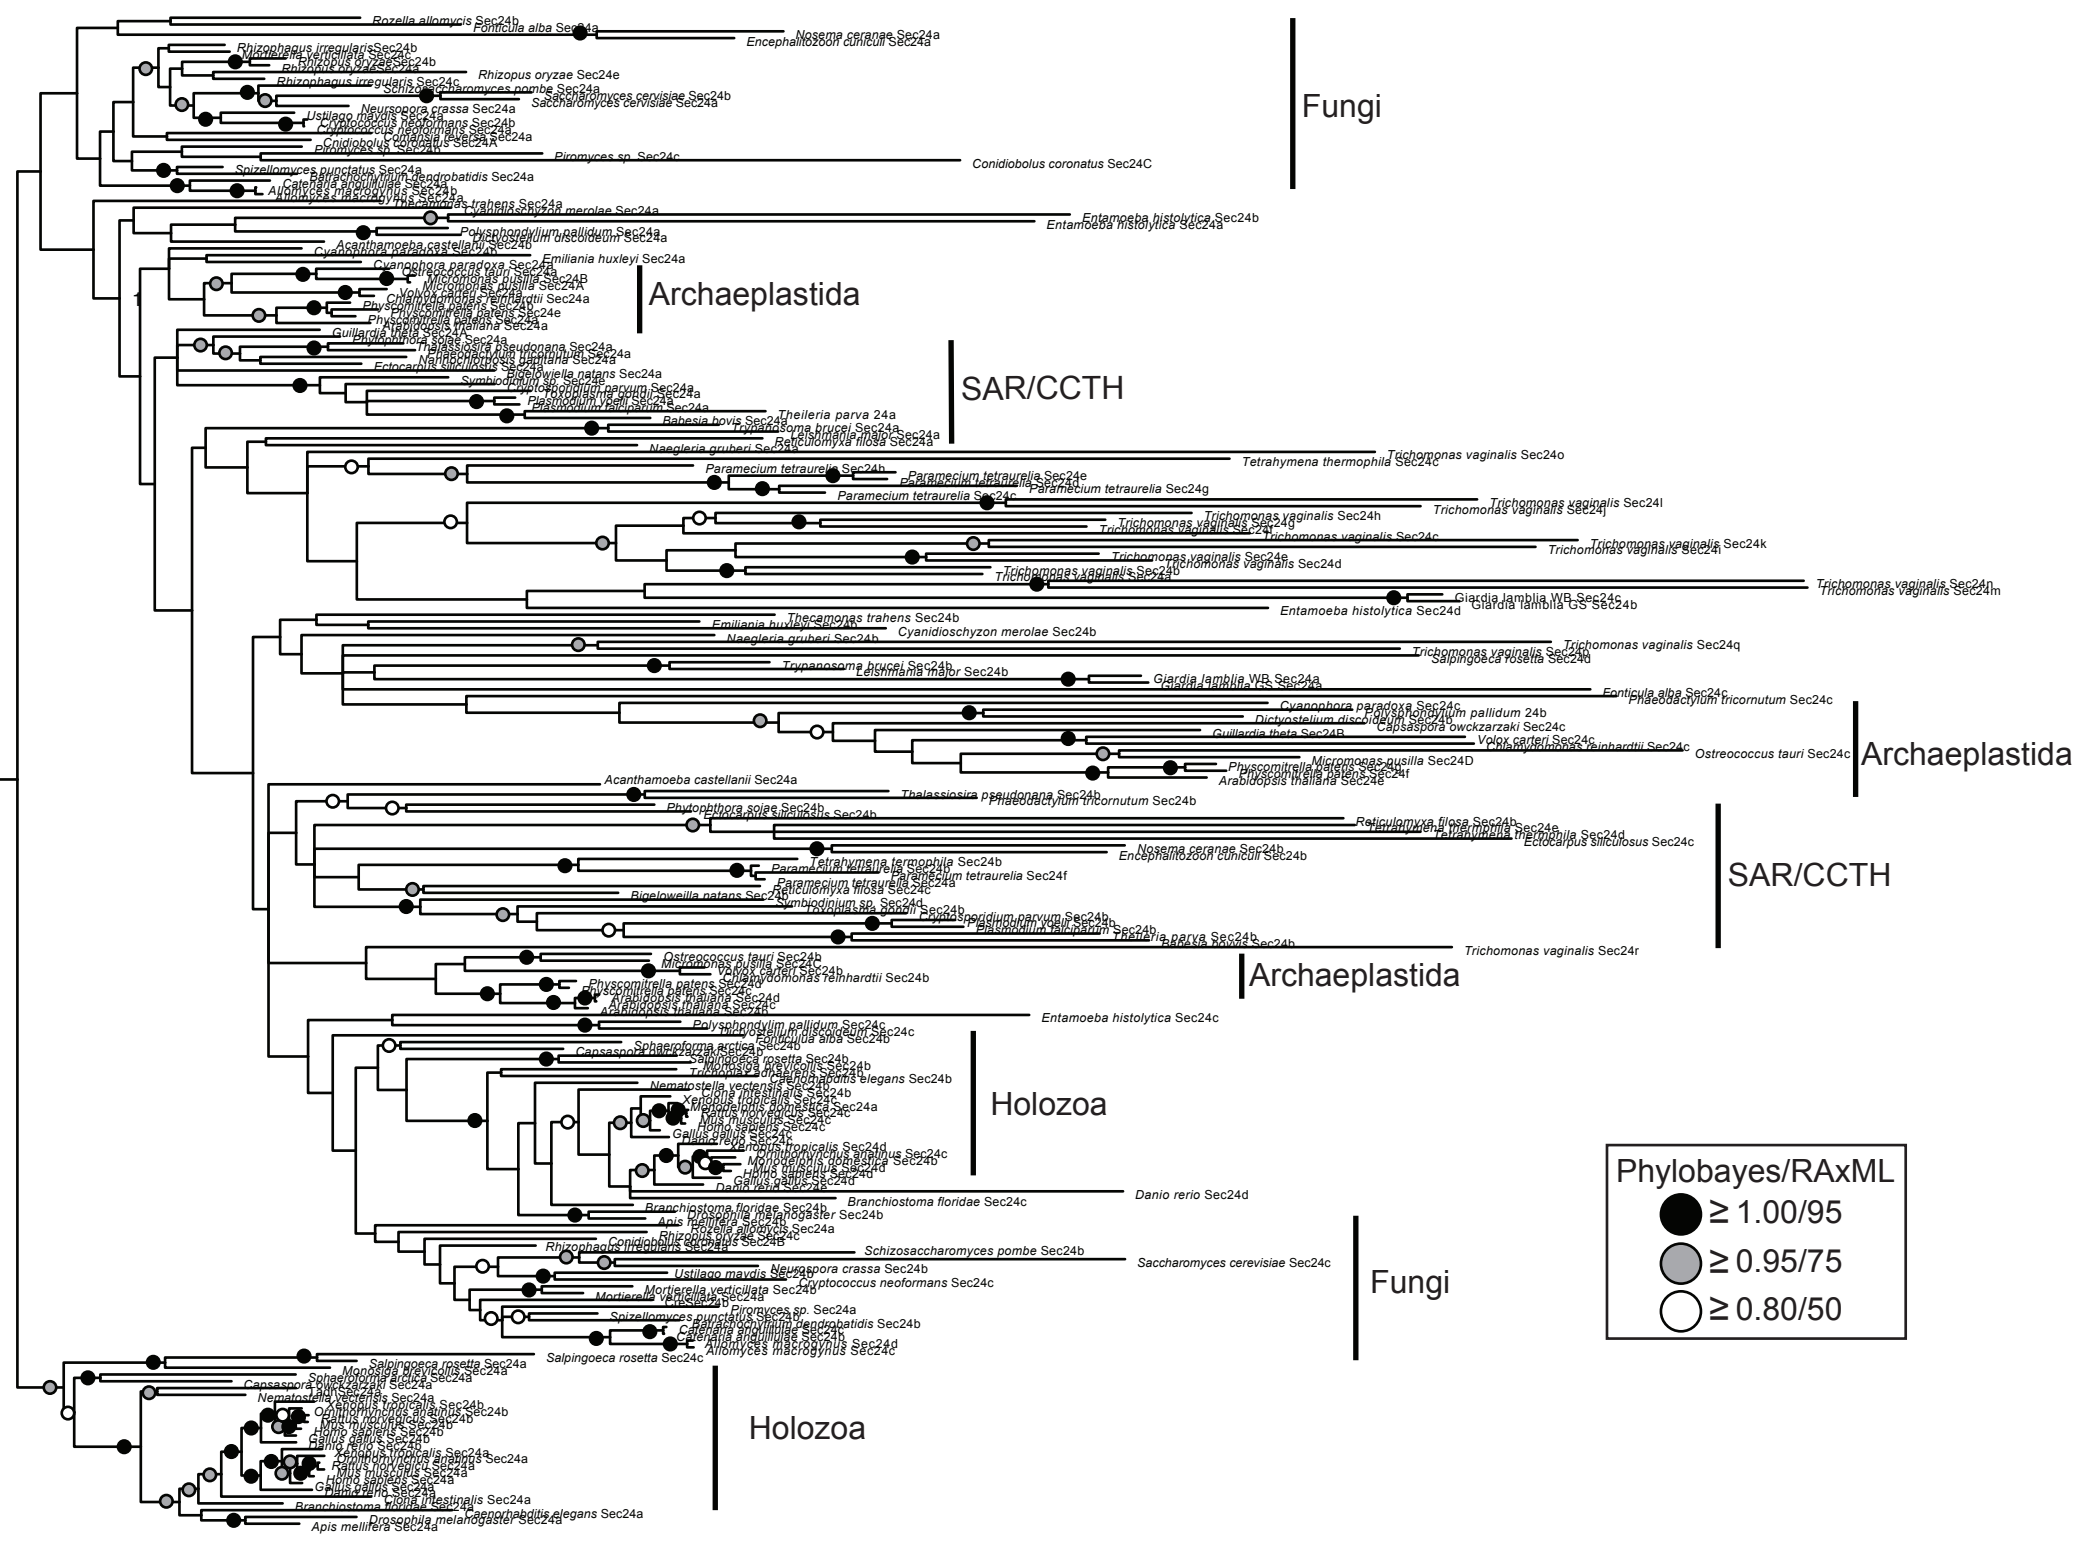

Schlacht and Dacks Figure S3

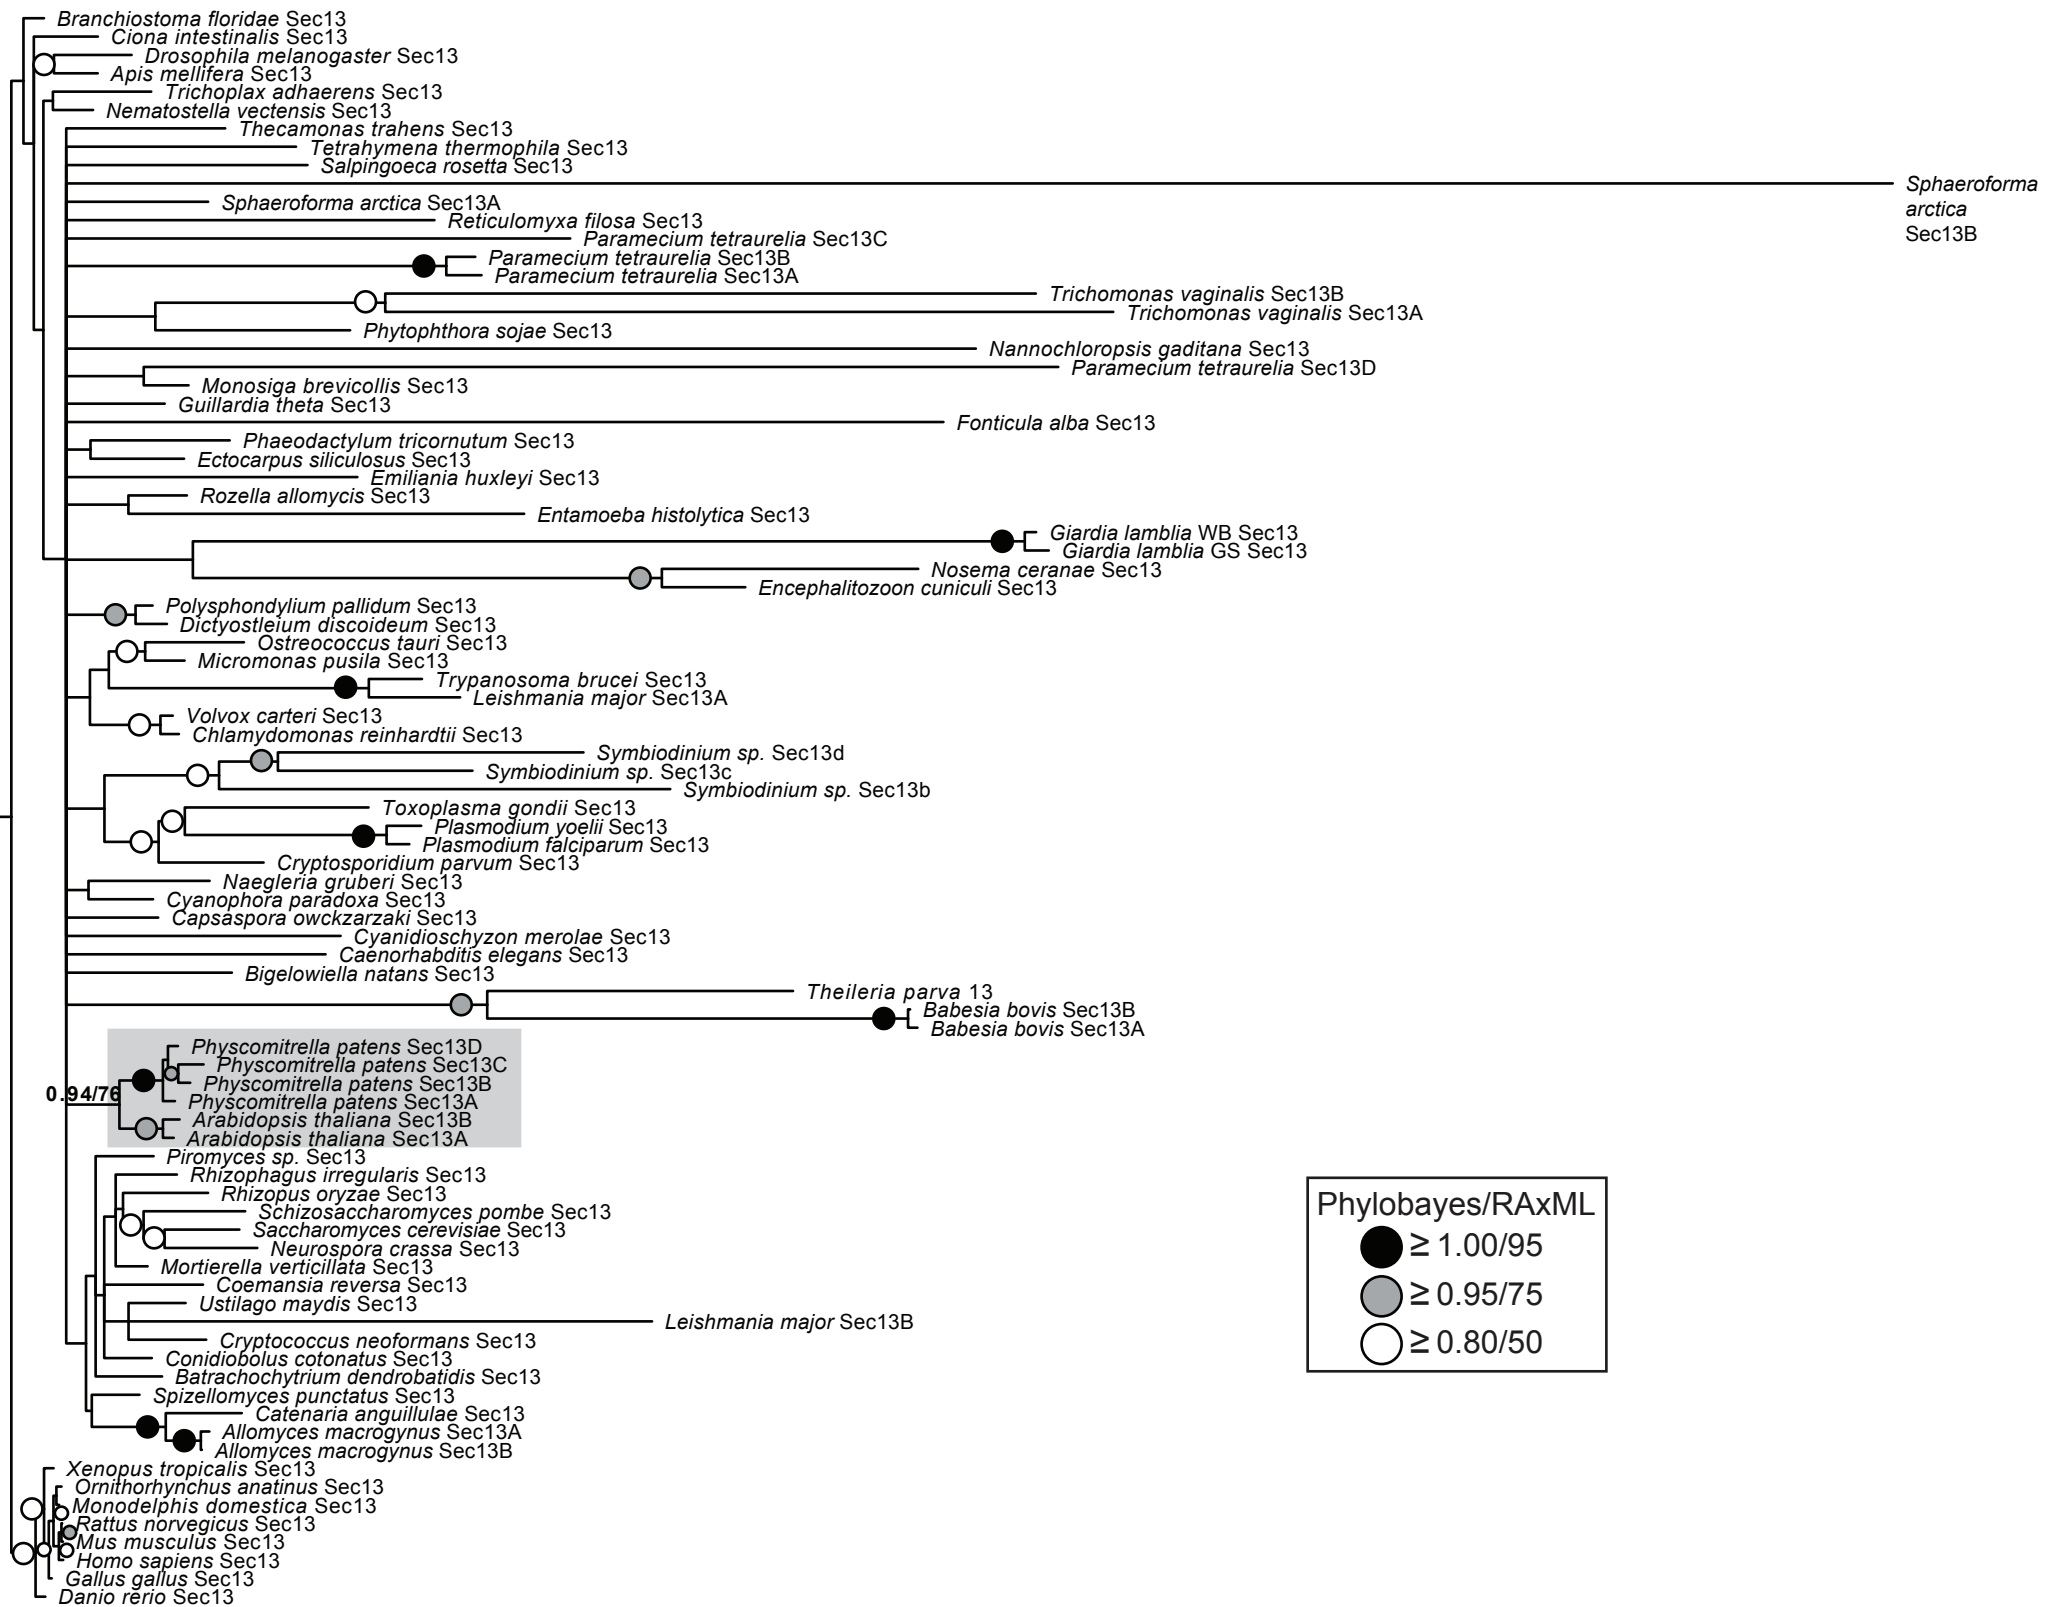

Schlacht and Dacks Figure S4

0.9



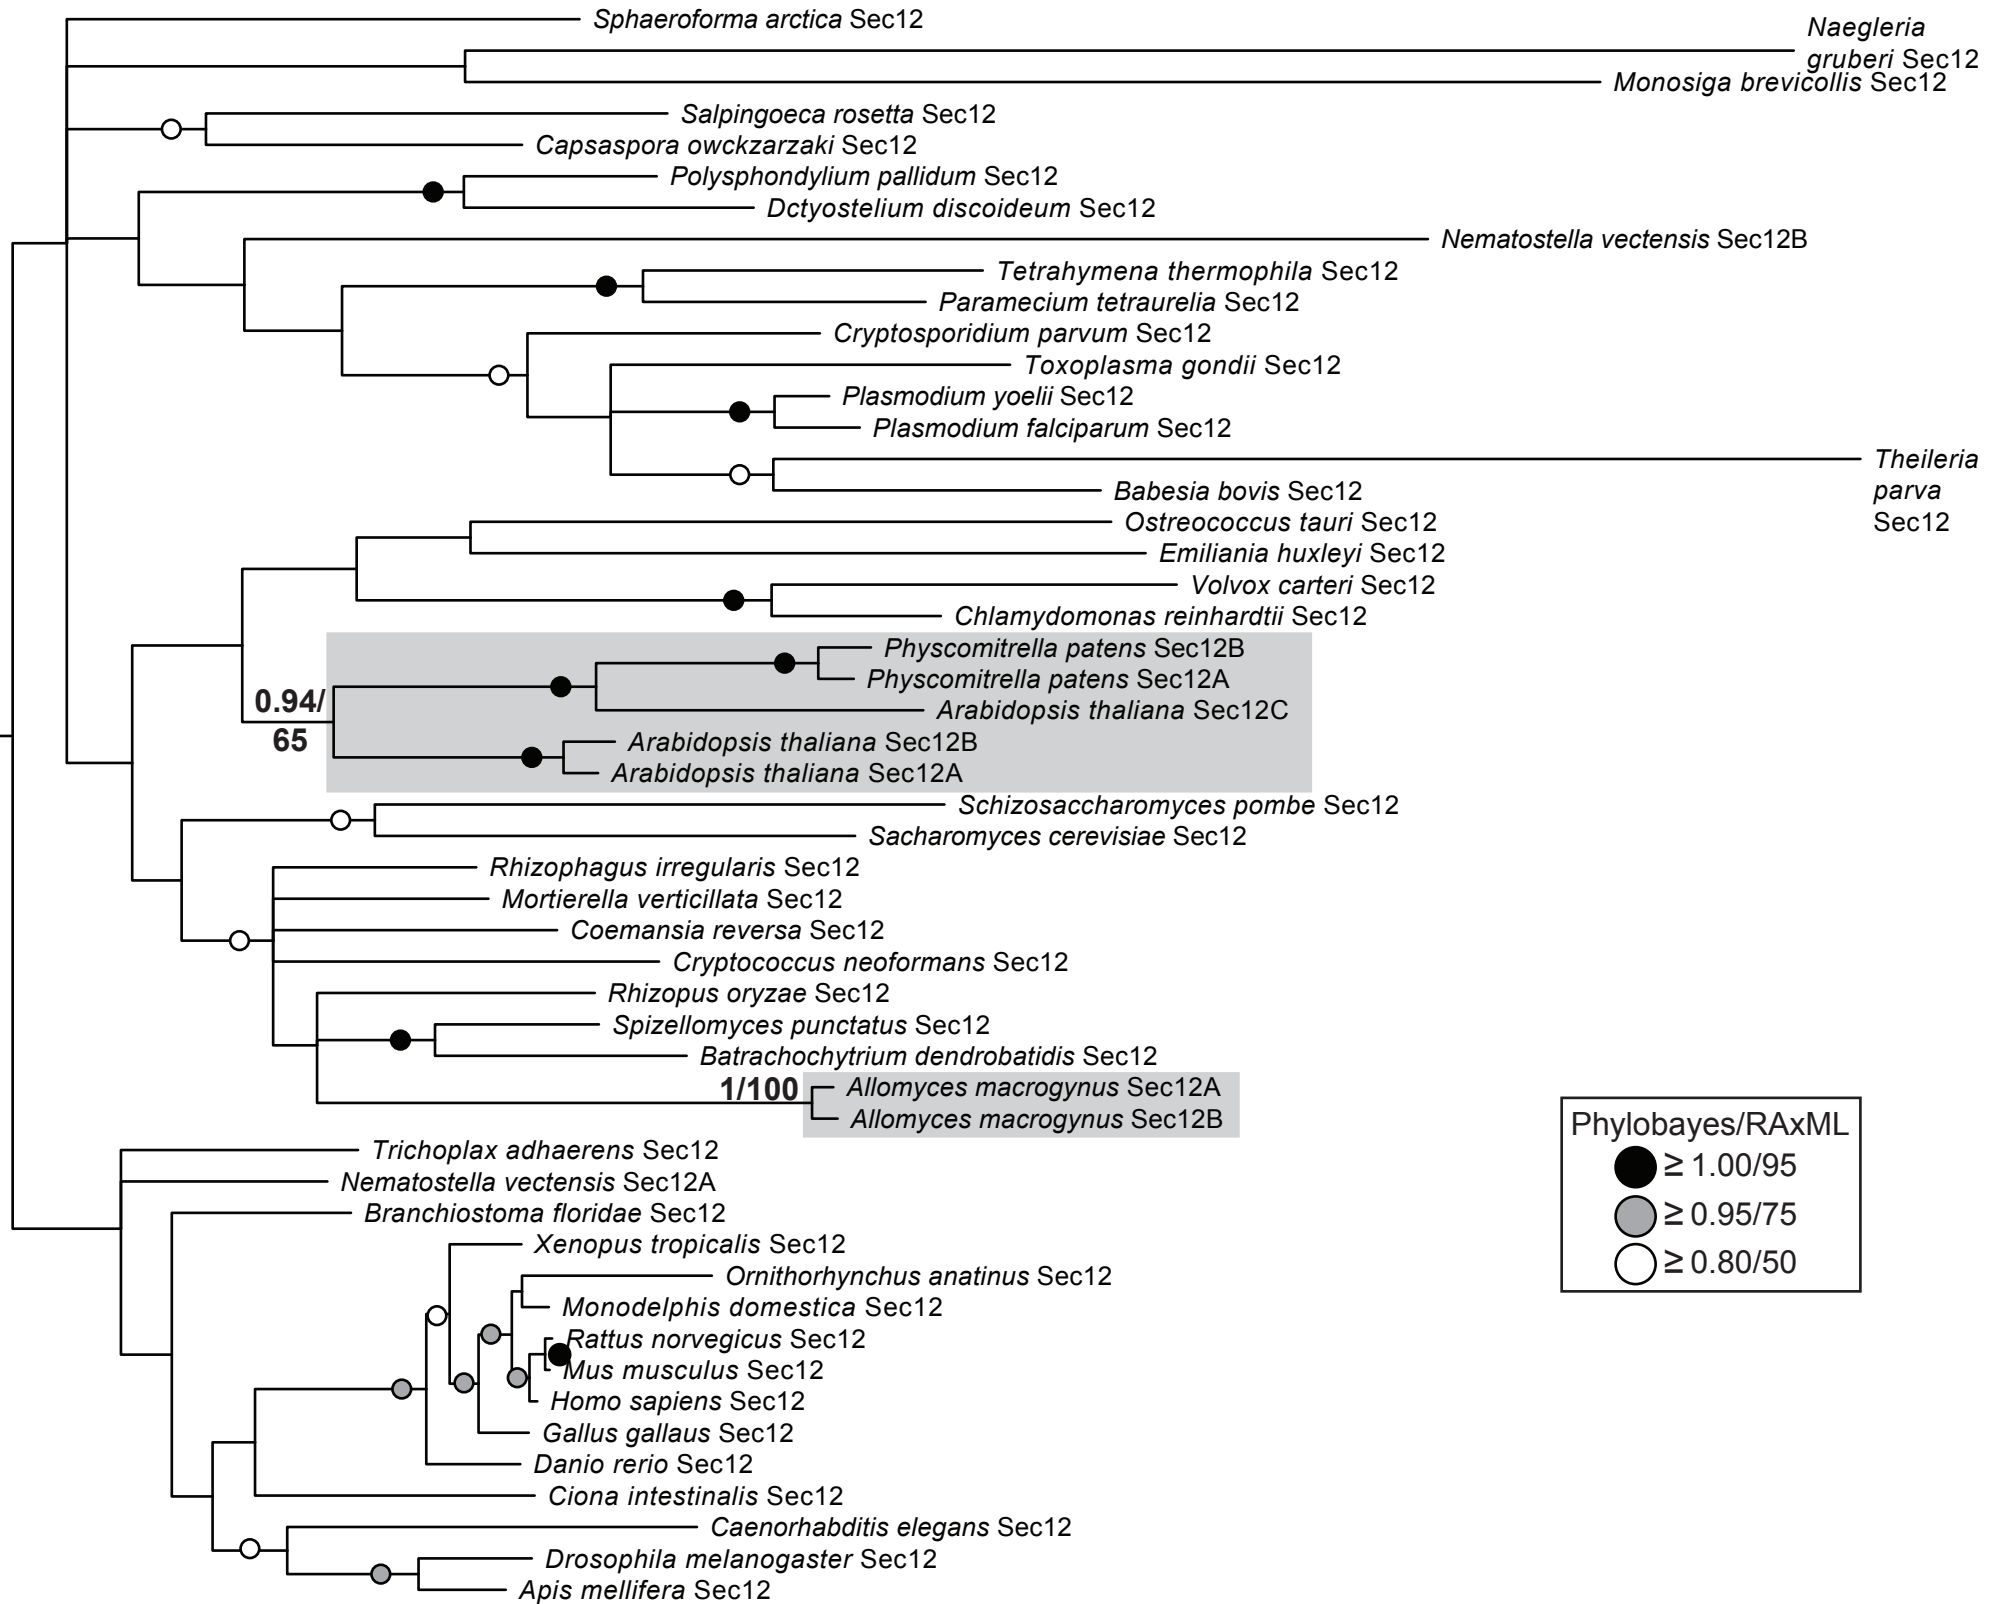

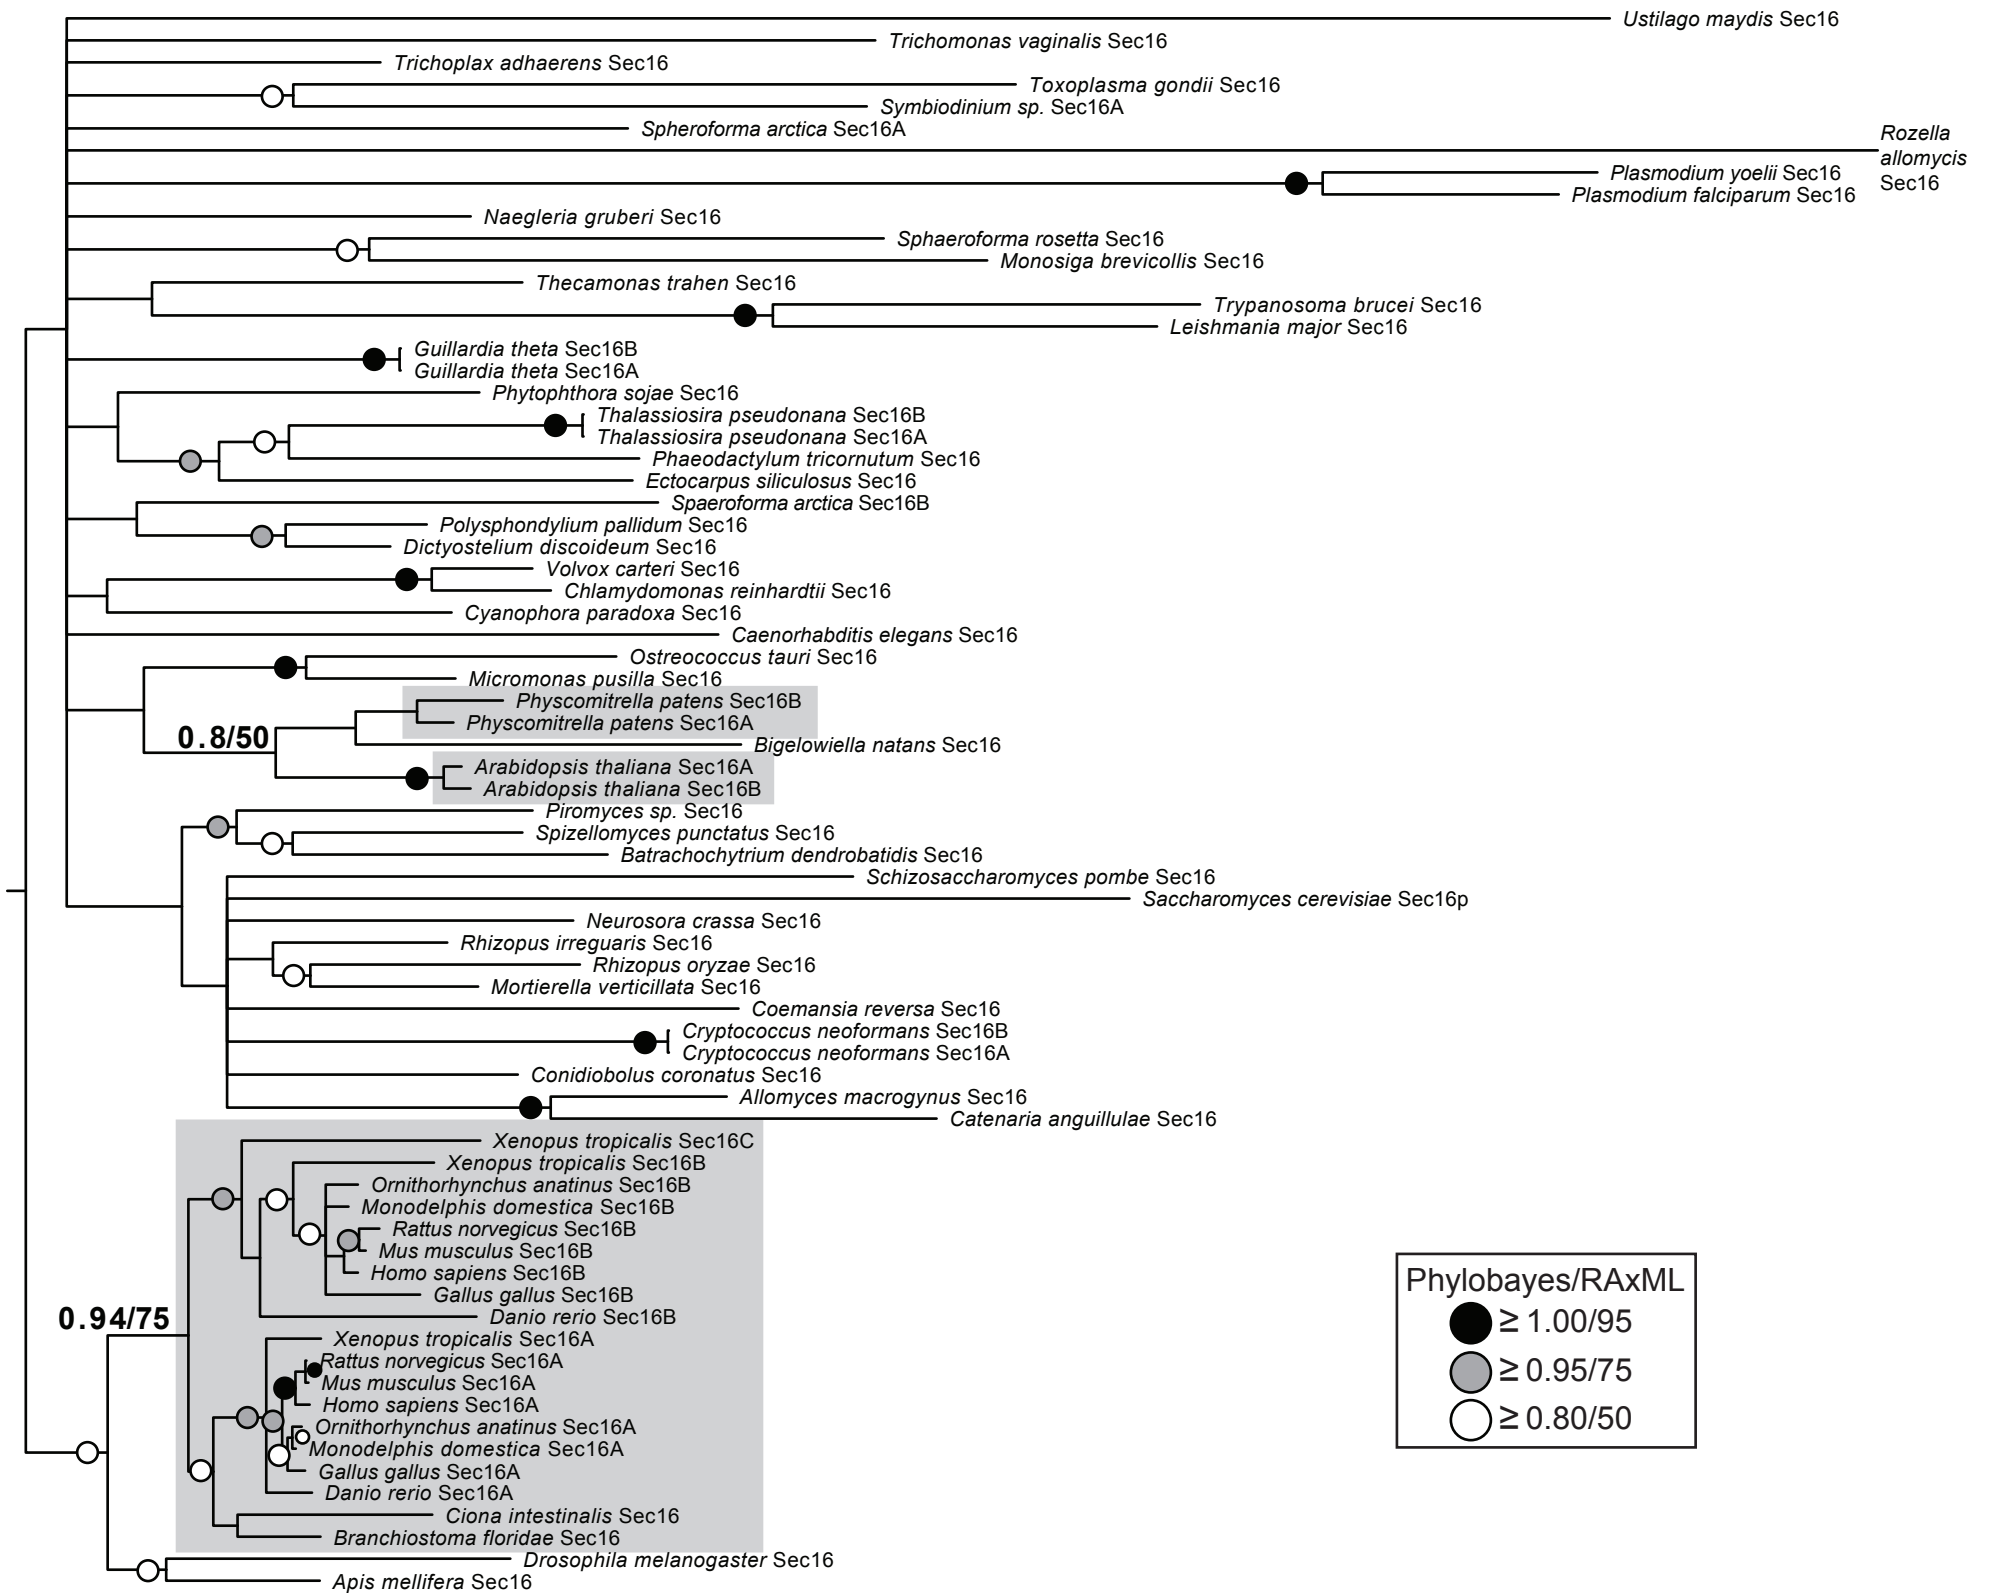

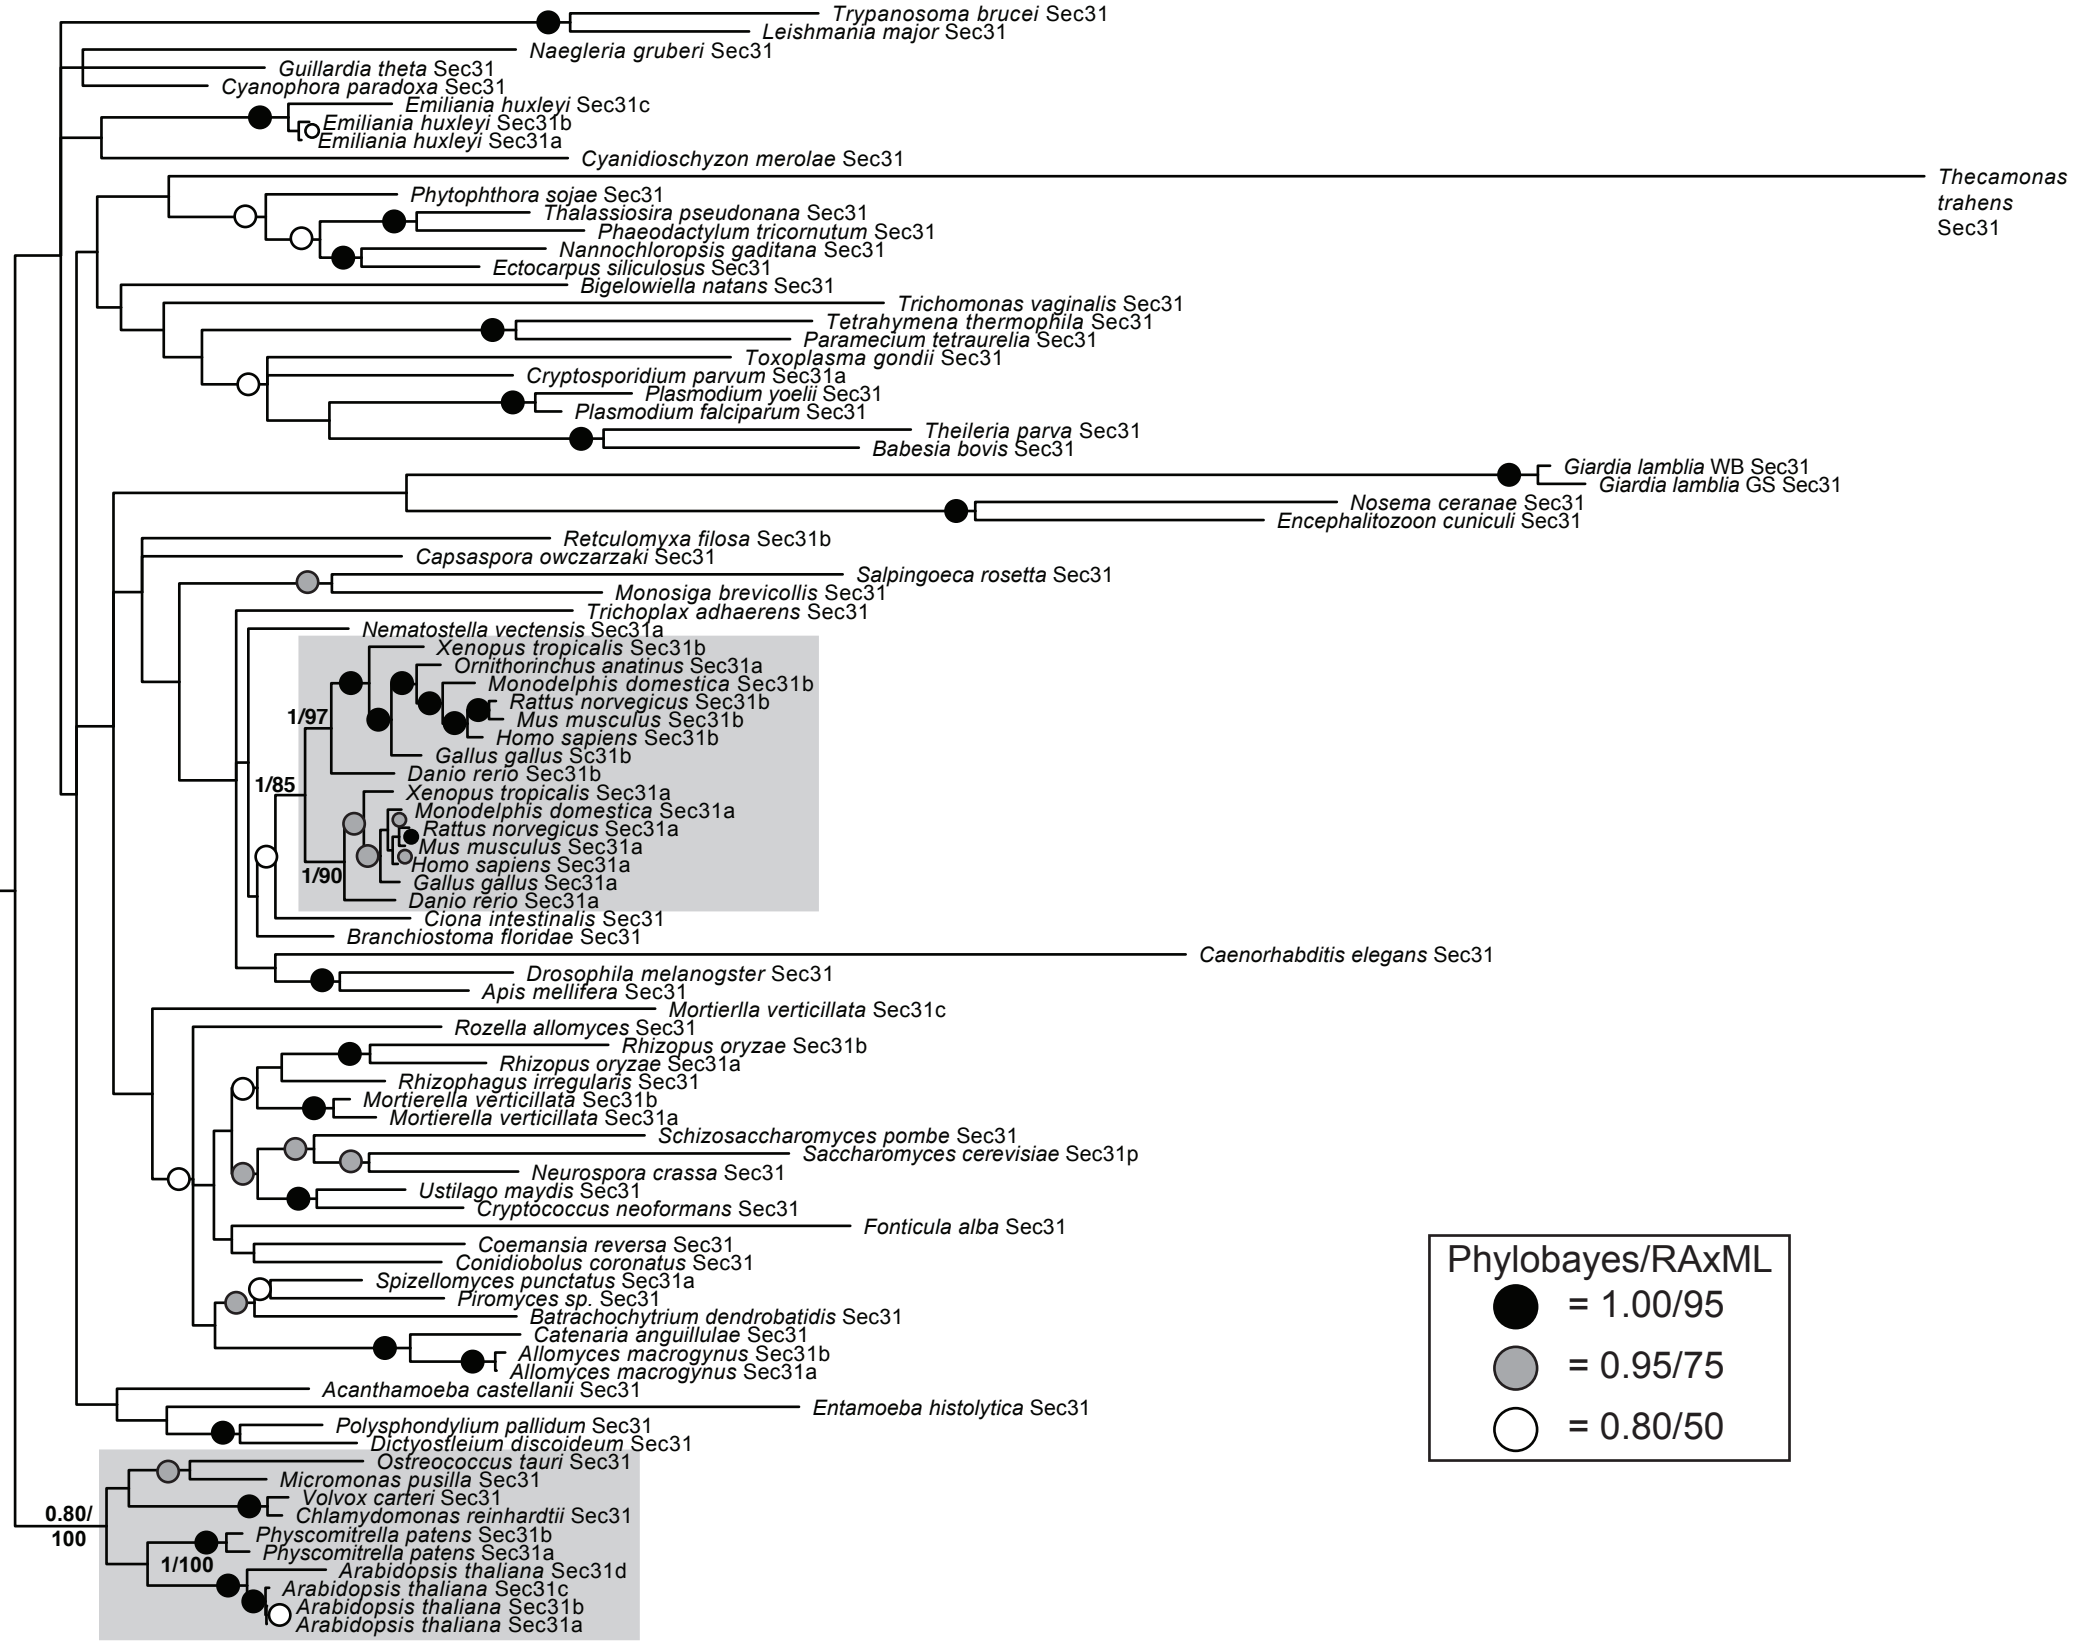

Schlacht and Dacks Figure S7

0.9

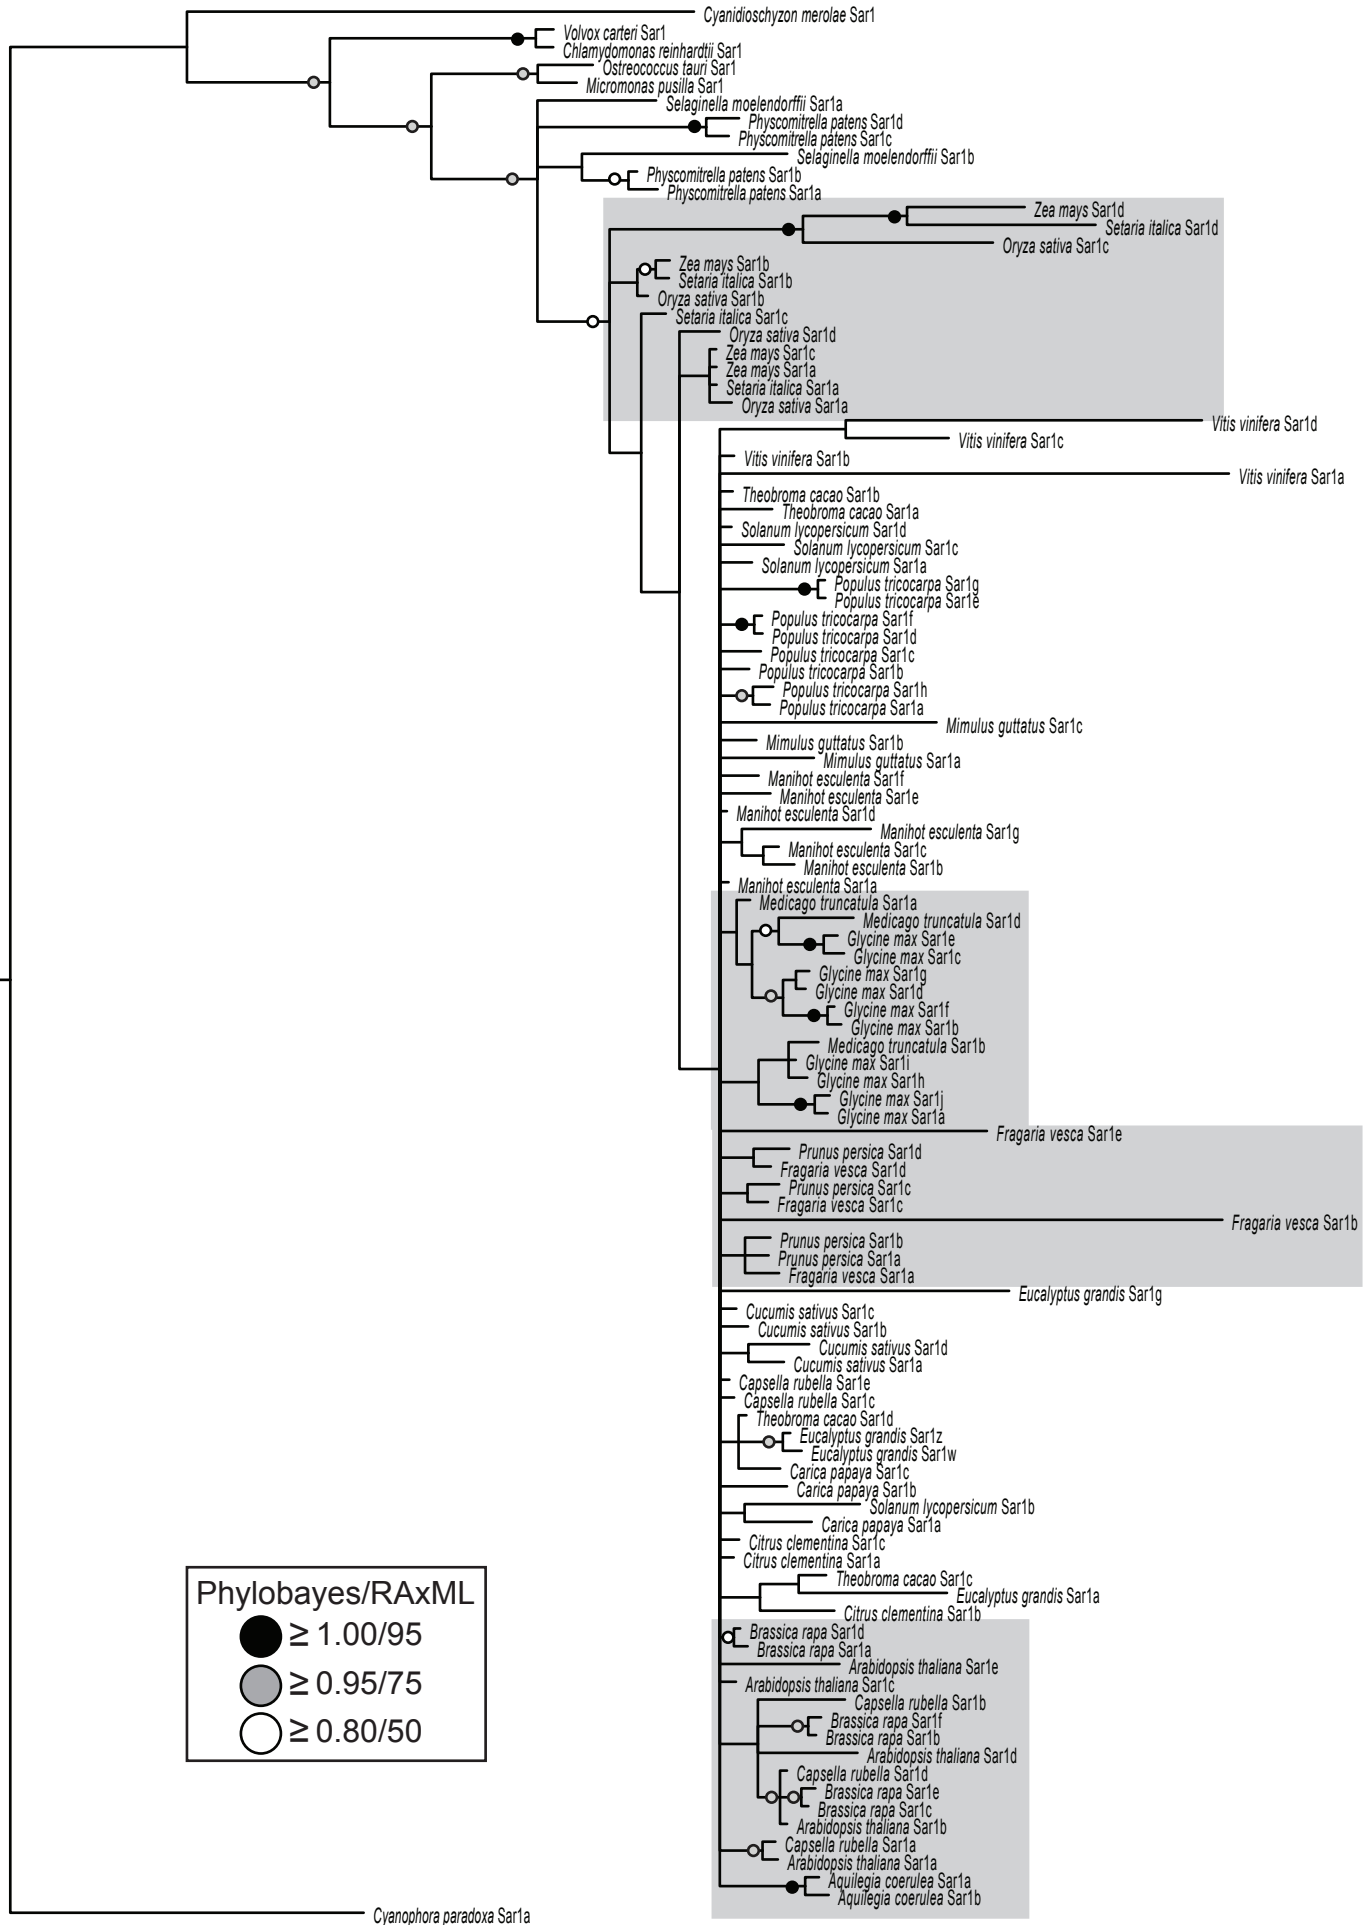



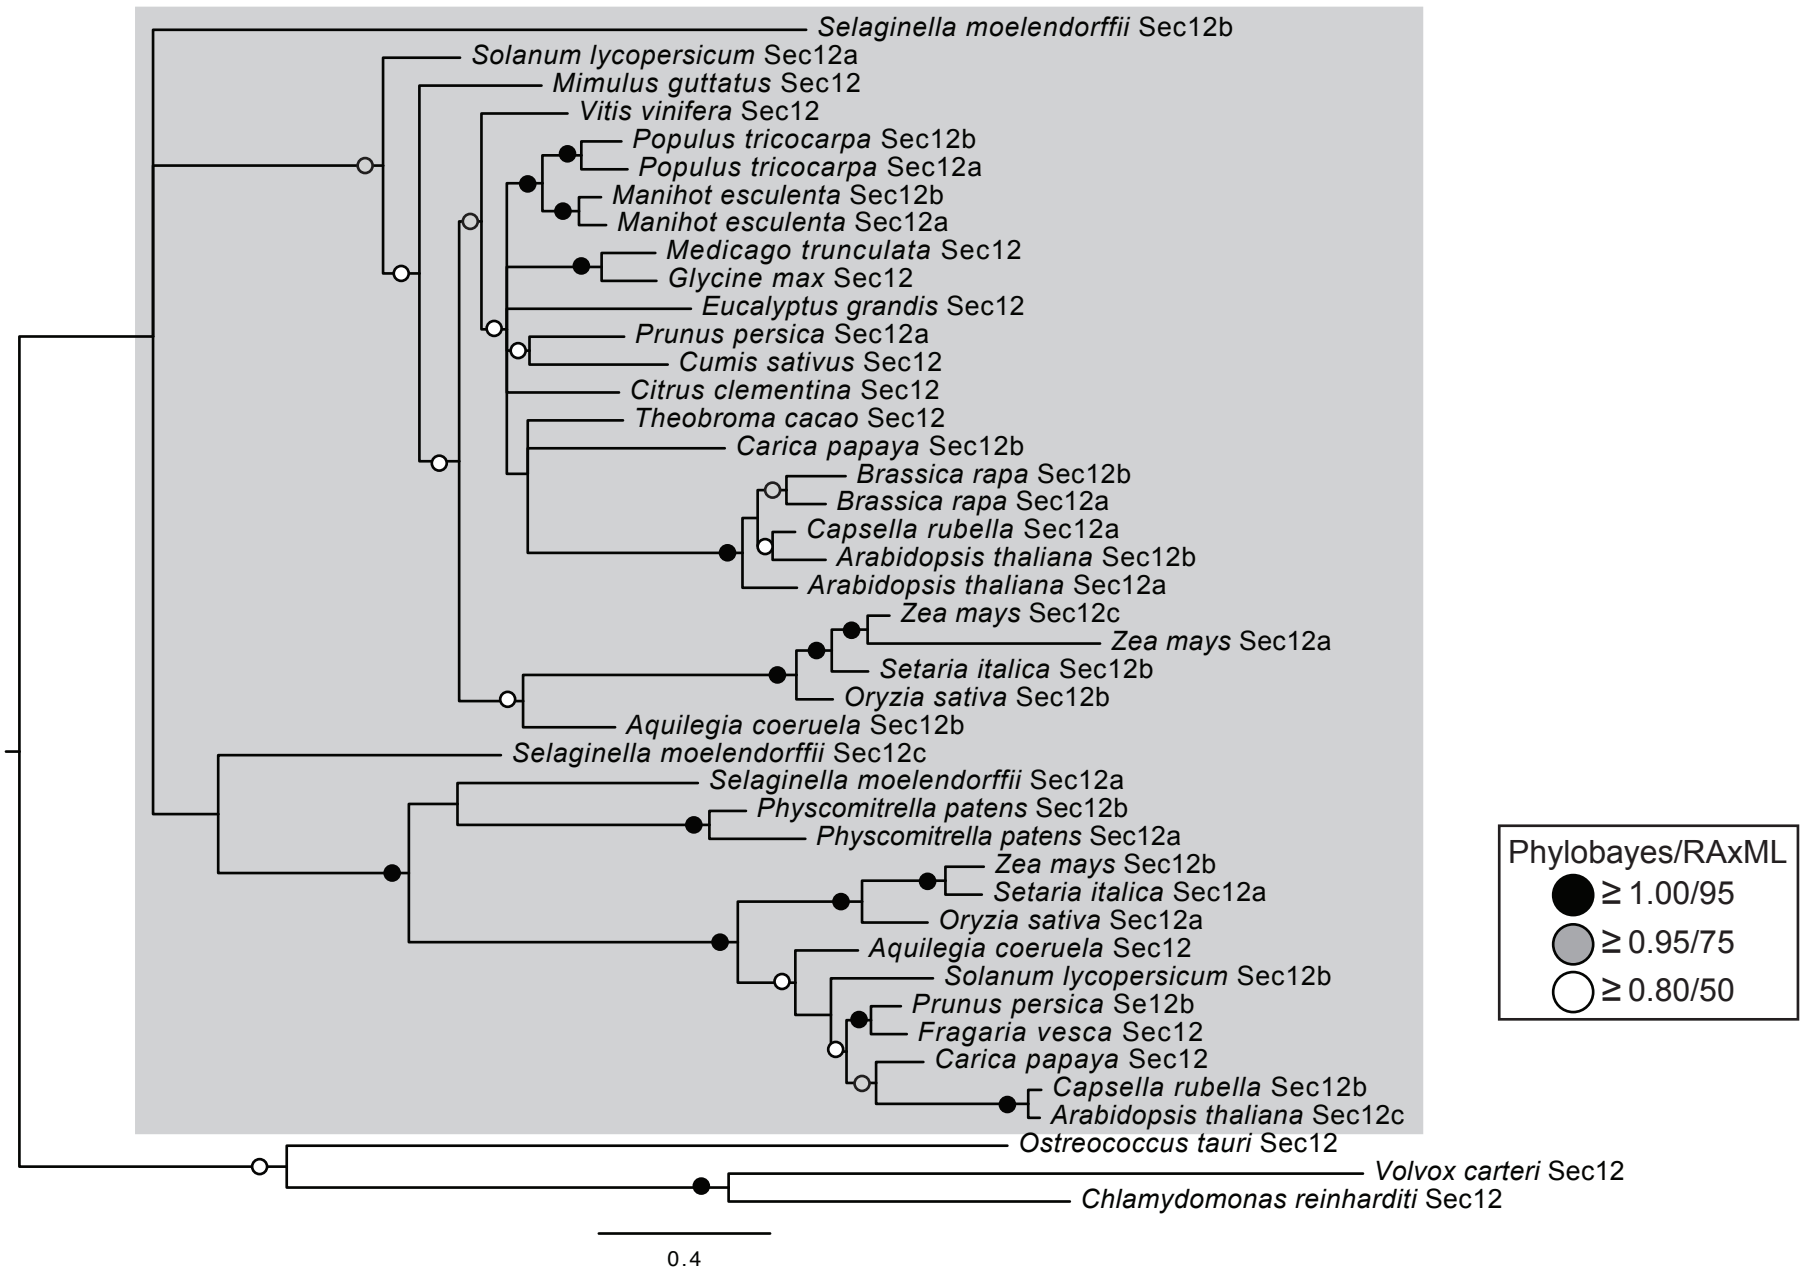

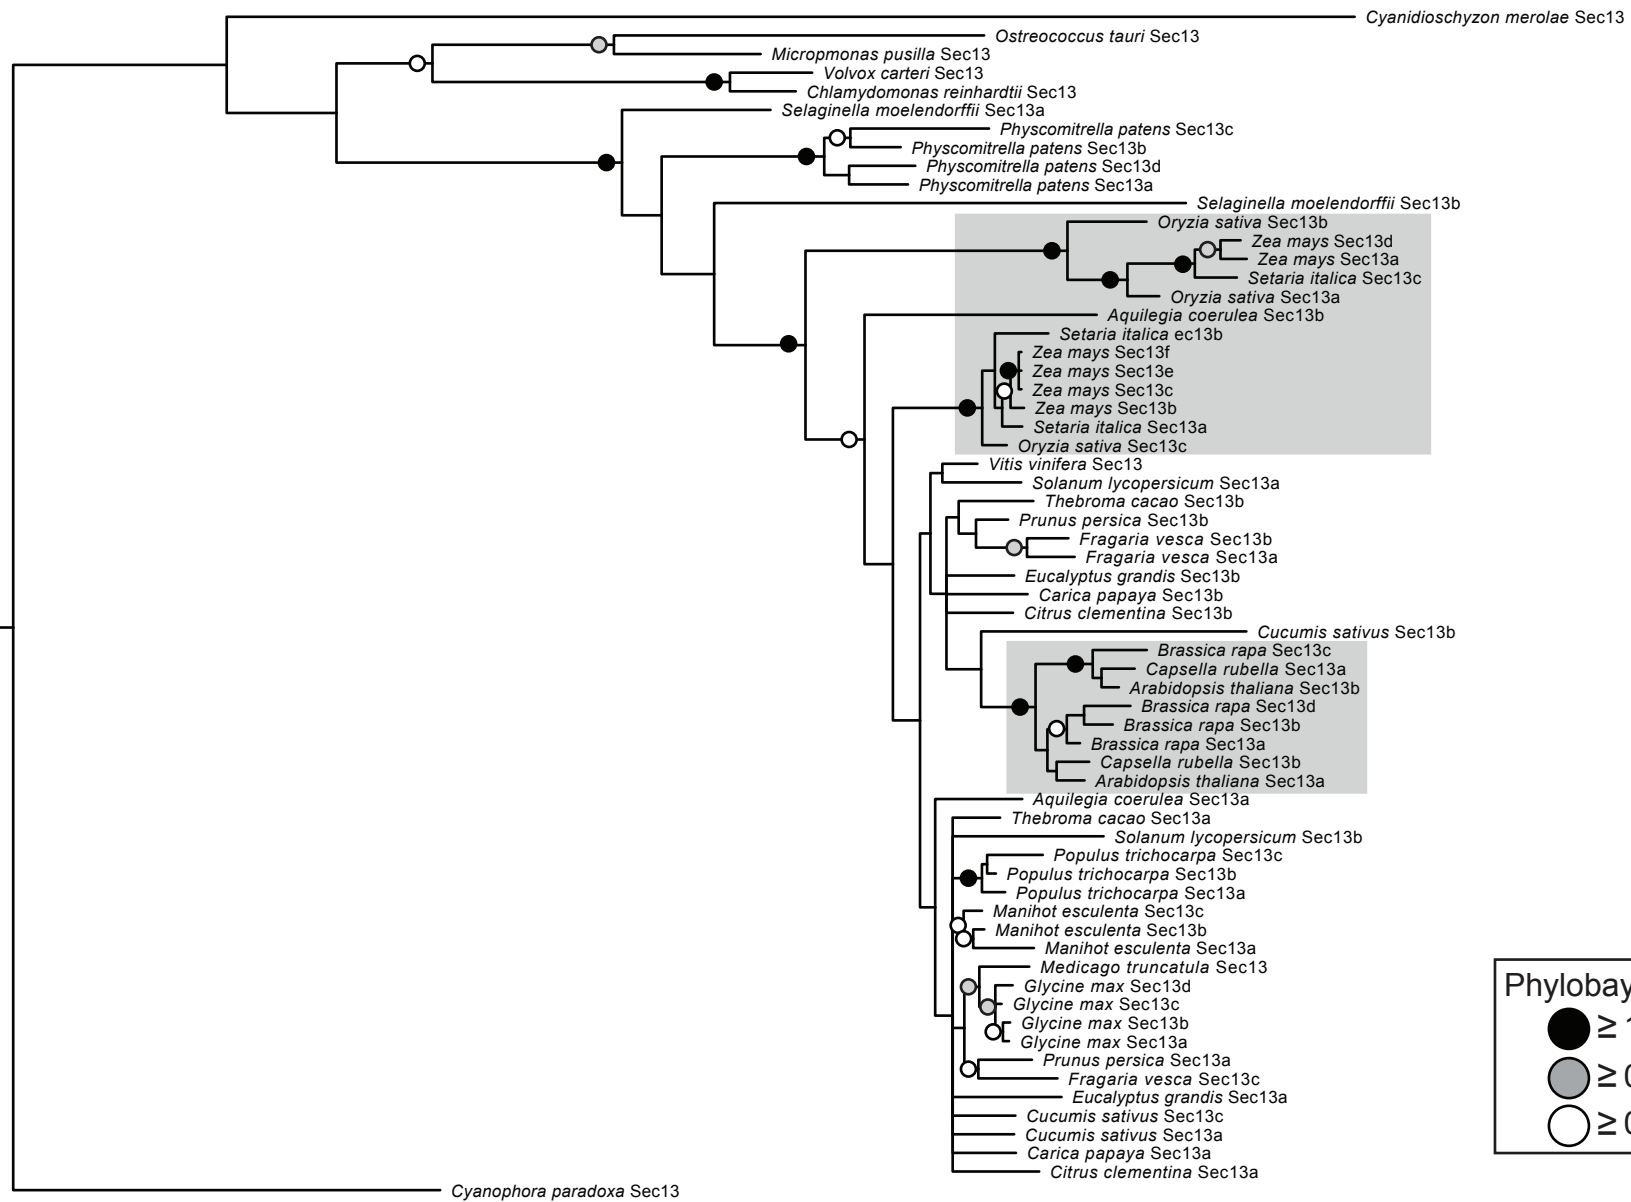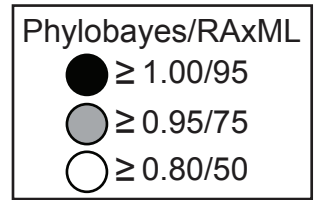

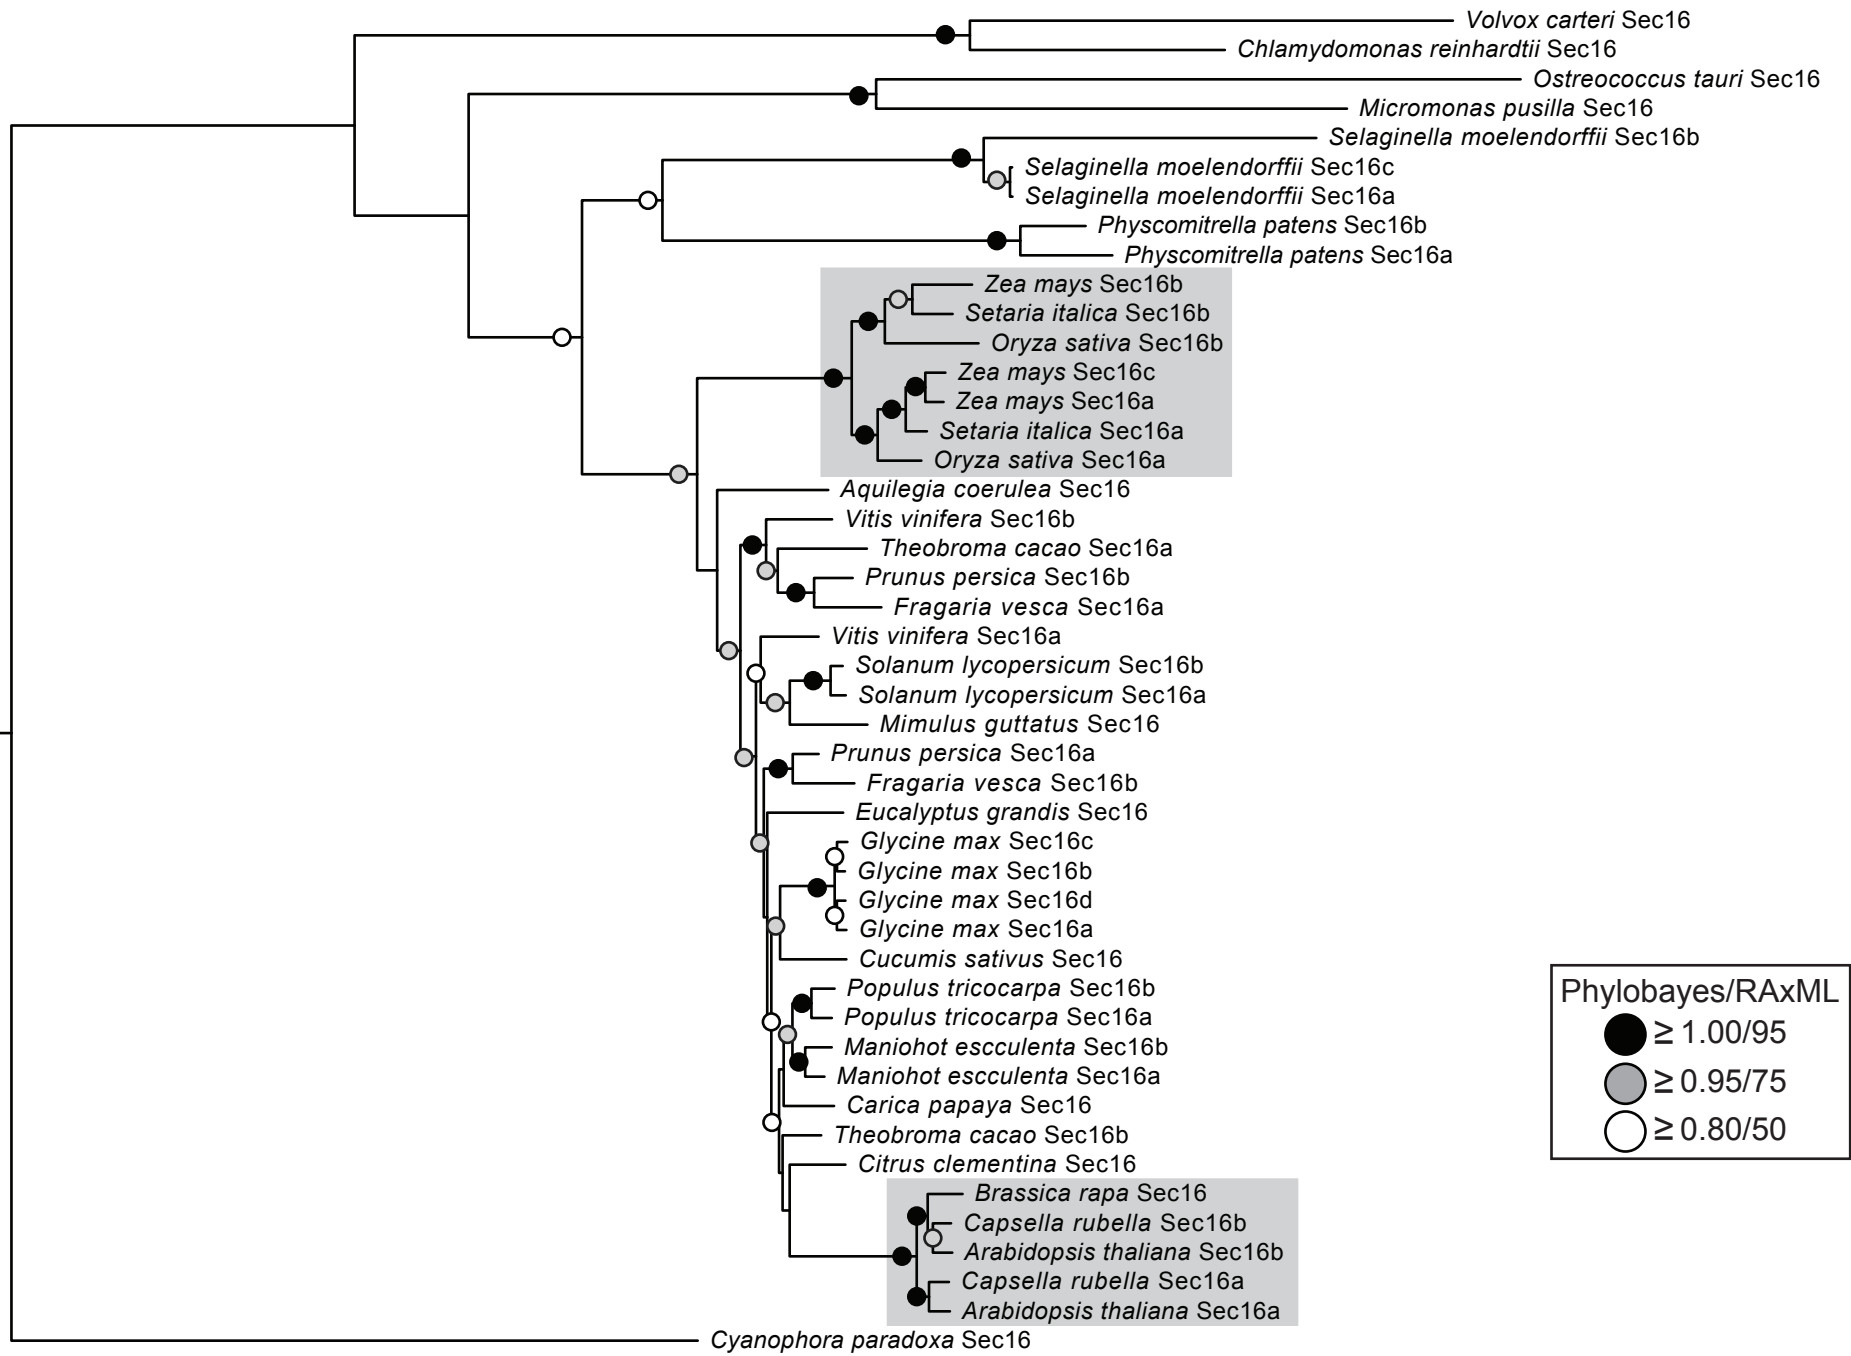

0.6

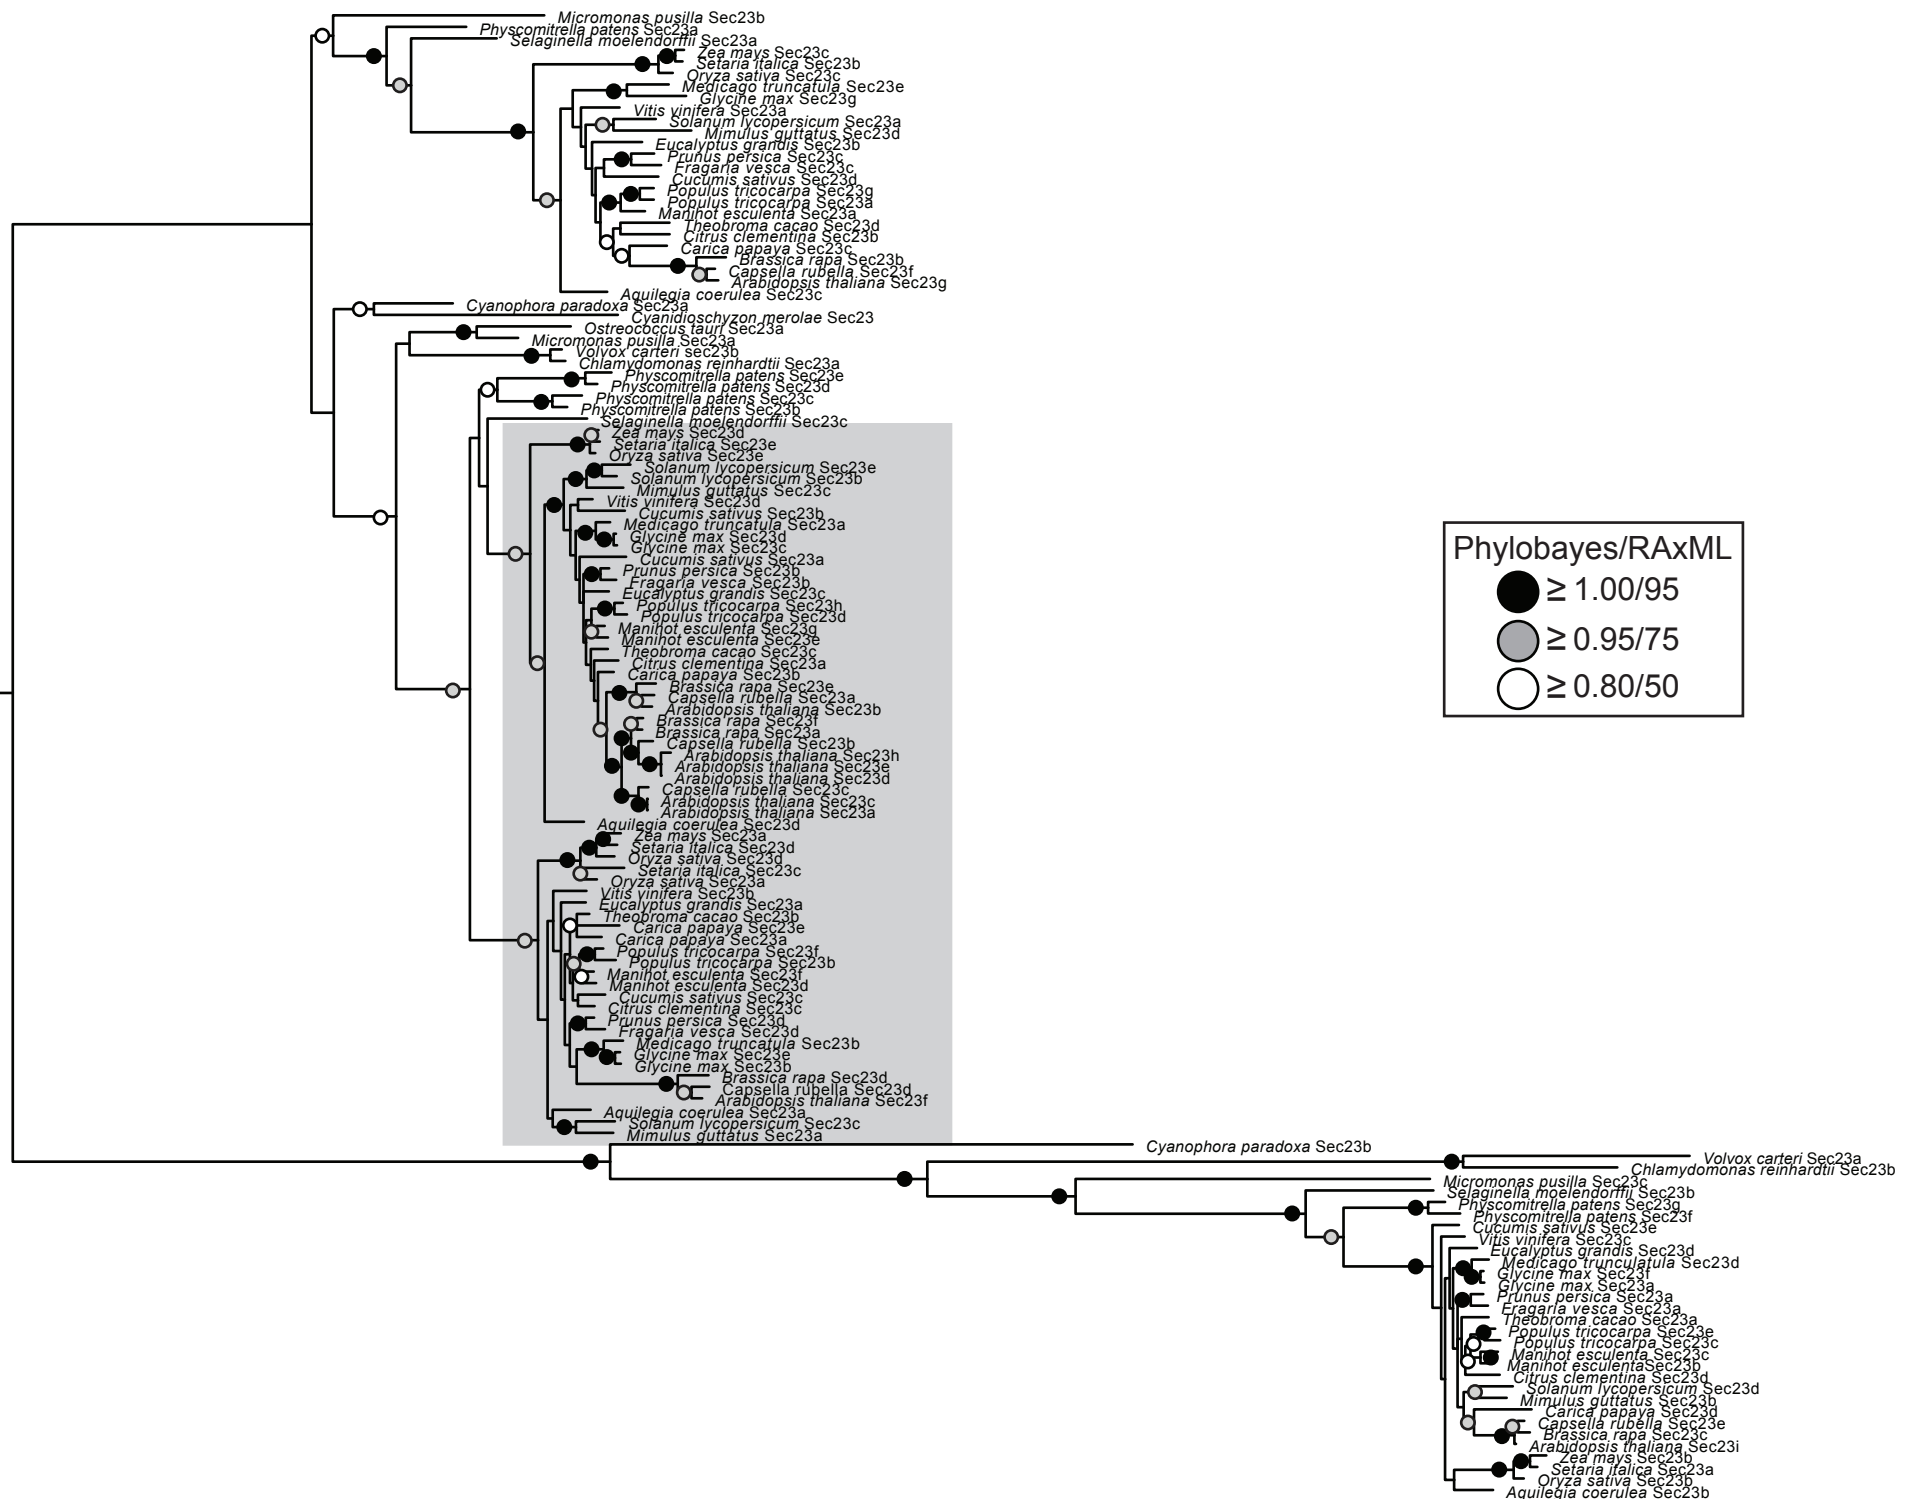

Schlacht and Dacks Figure S12

0.6

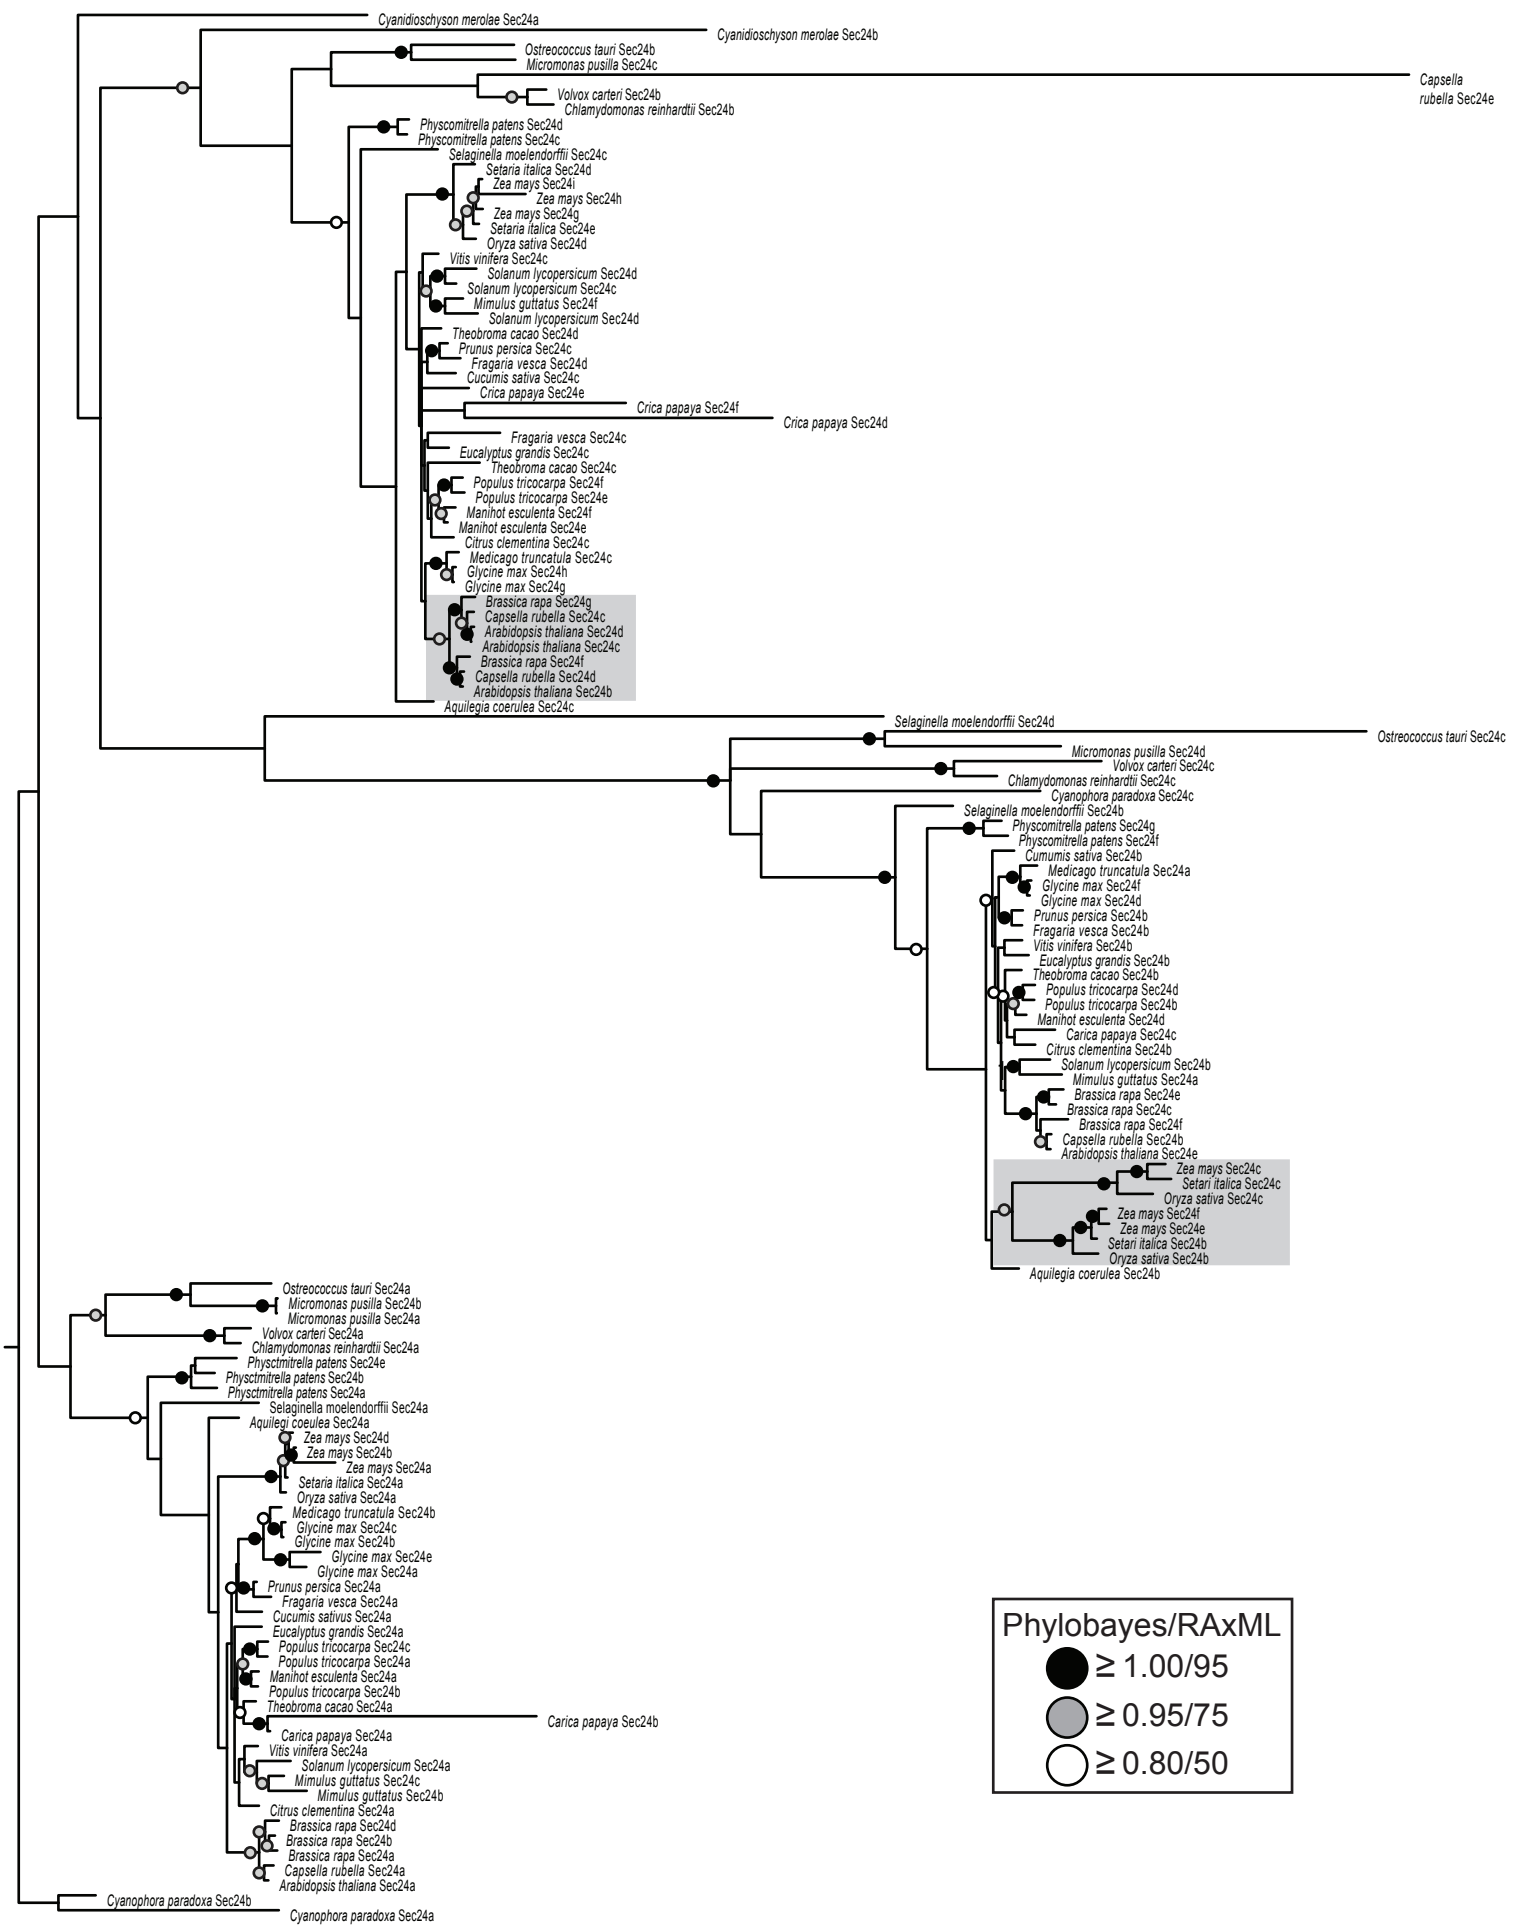



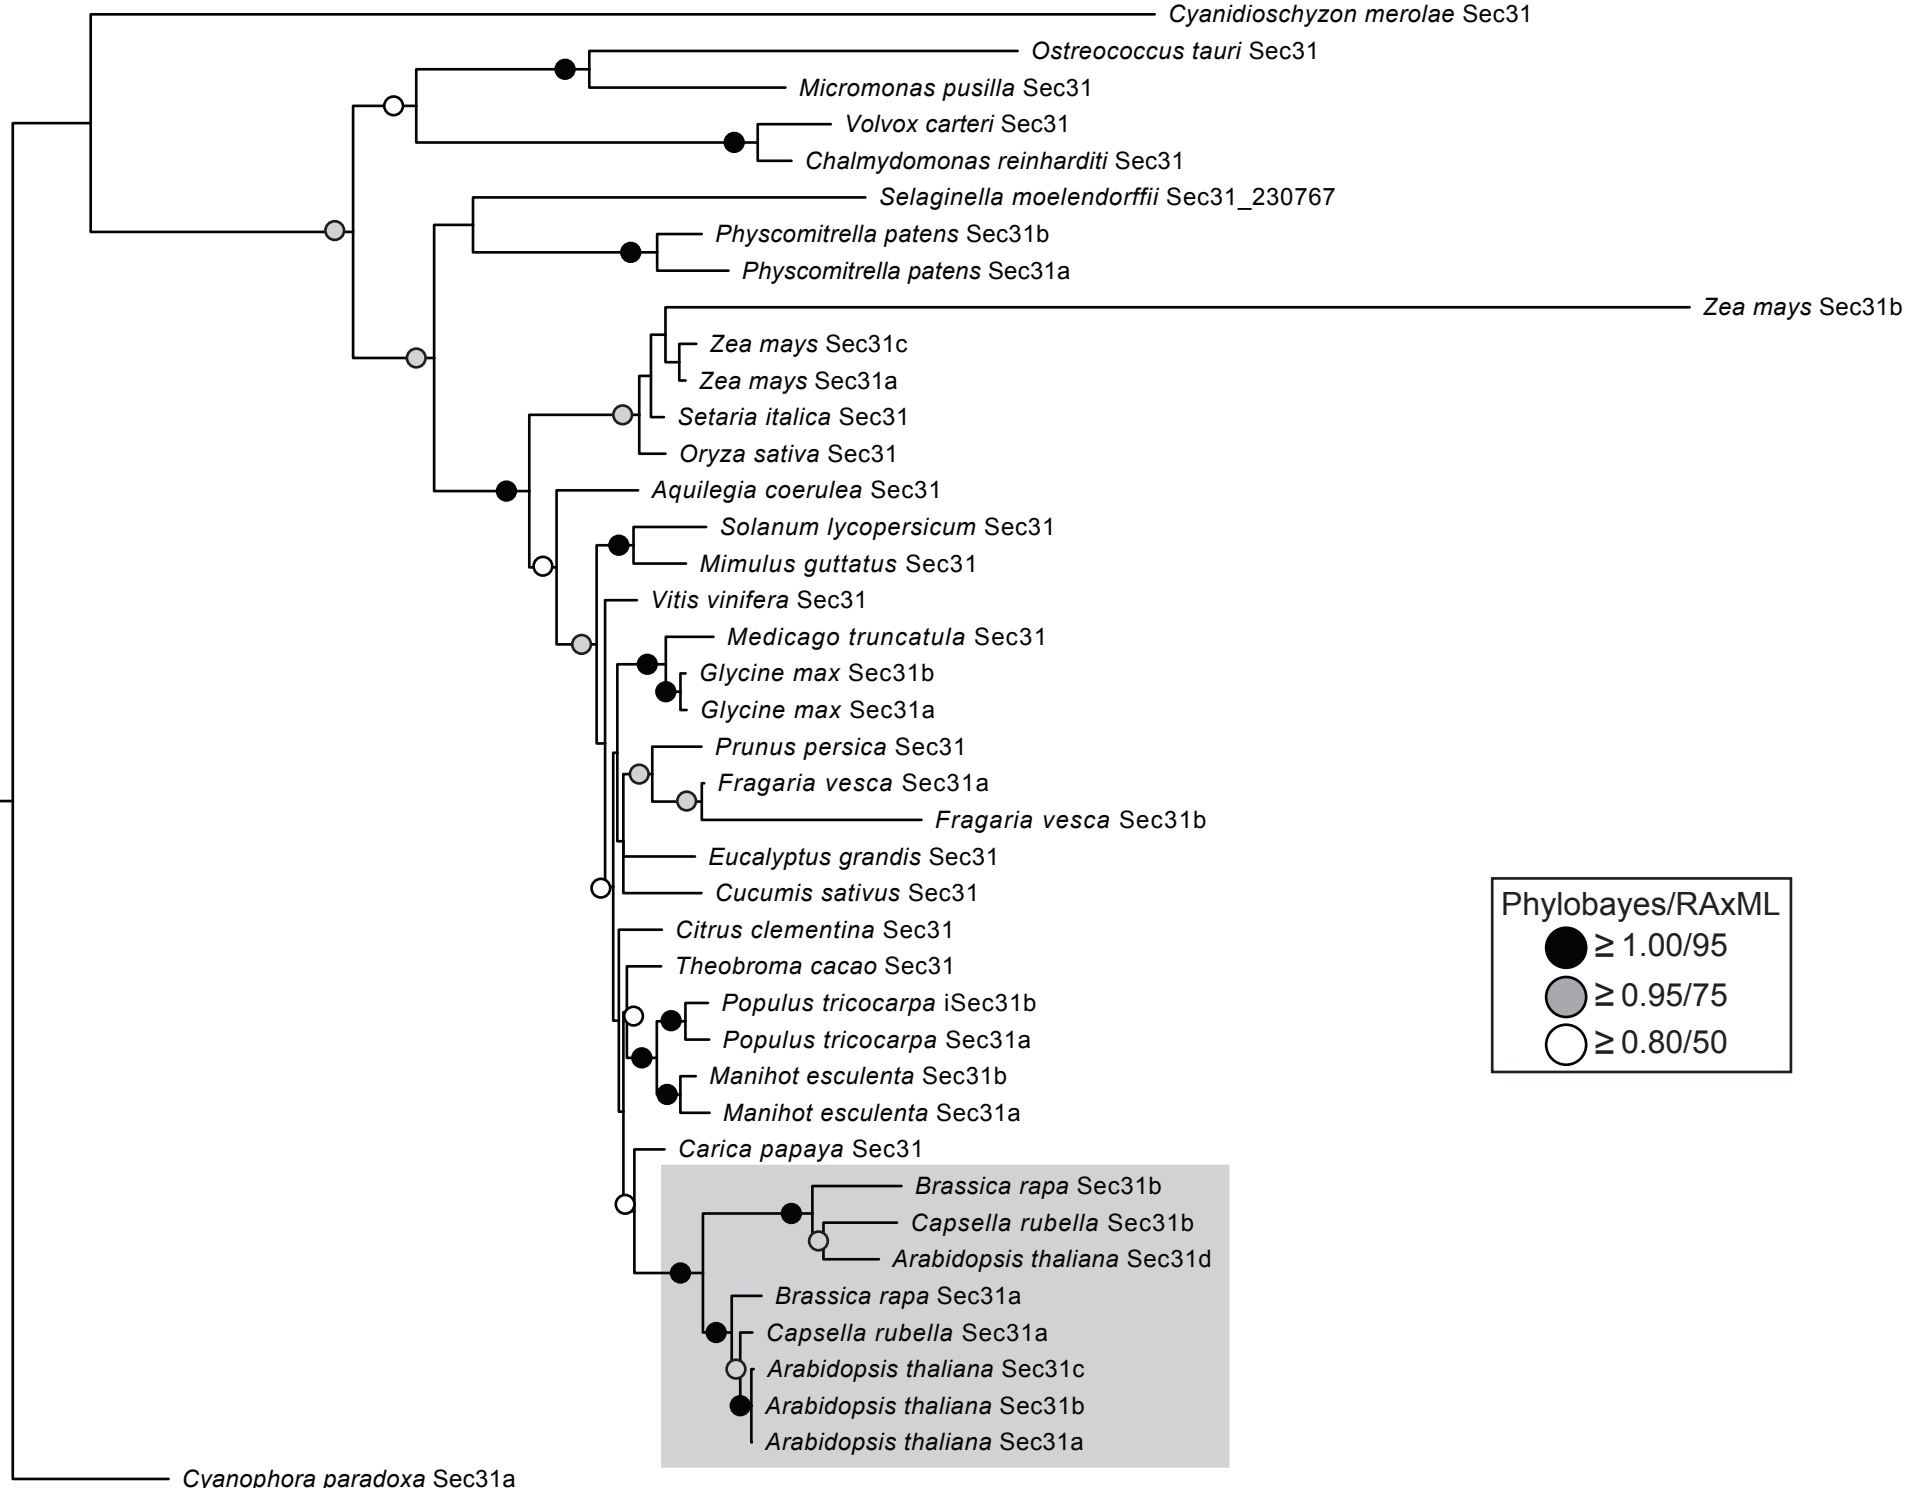

Phylobayes/RAXML

- $\geq 1.00/95$
- $\geq 0.95/75$
- $\geq 0.80/50$

0.5



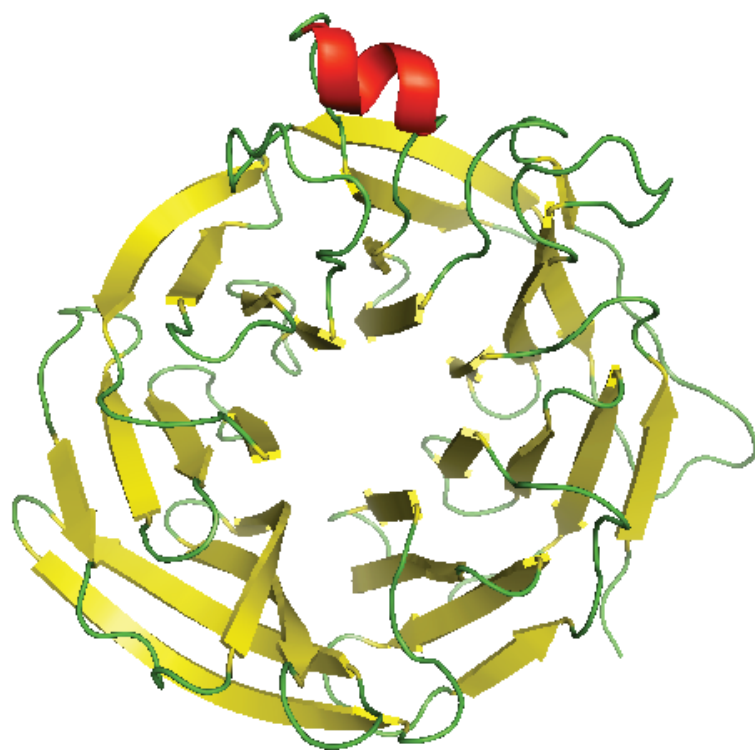

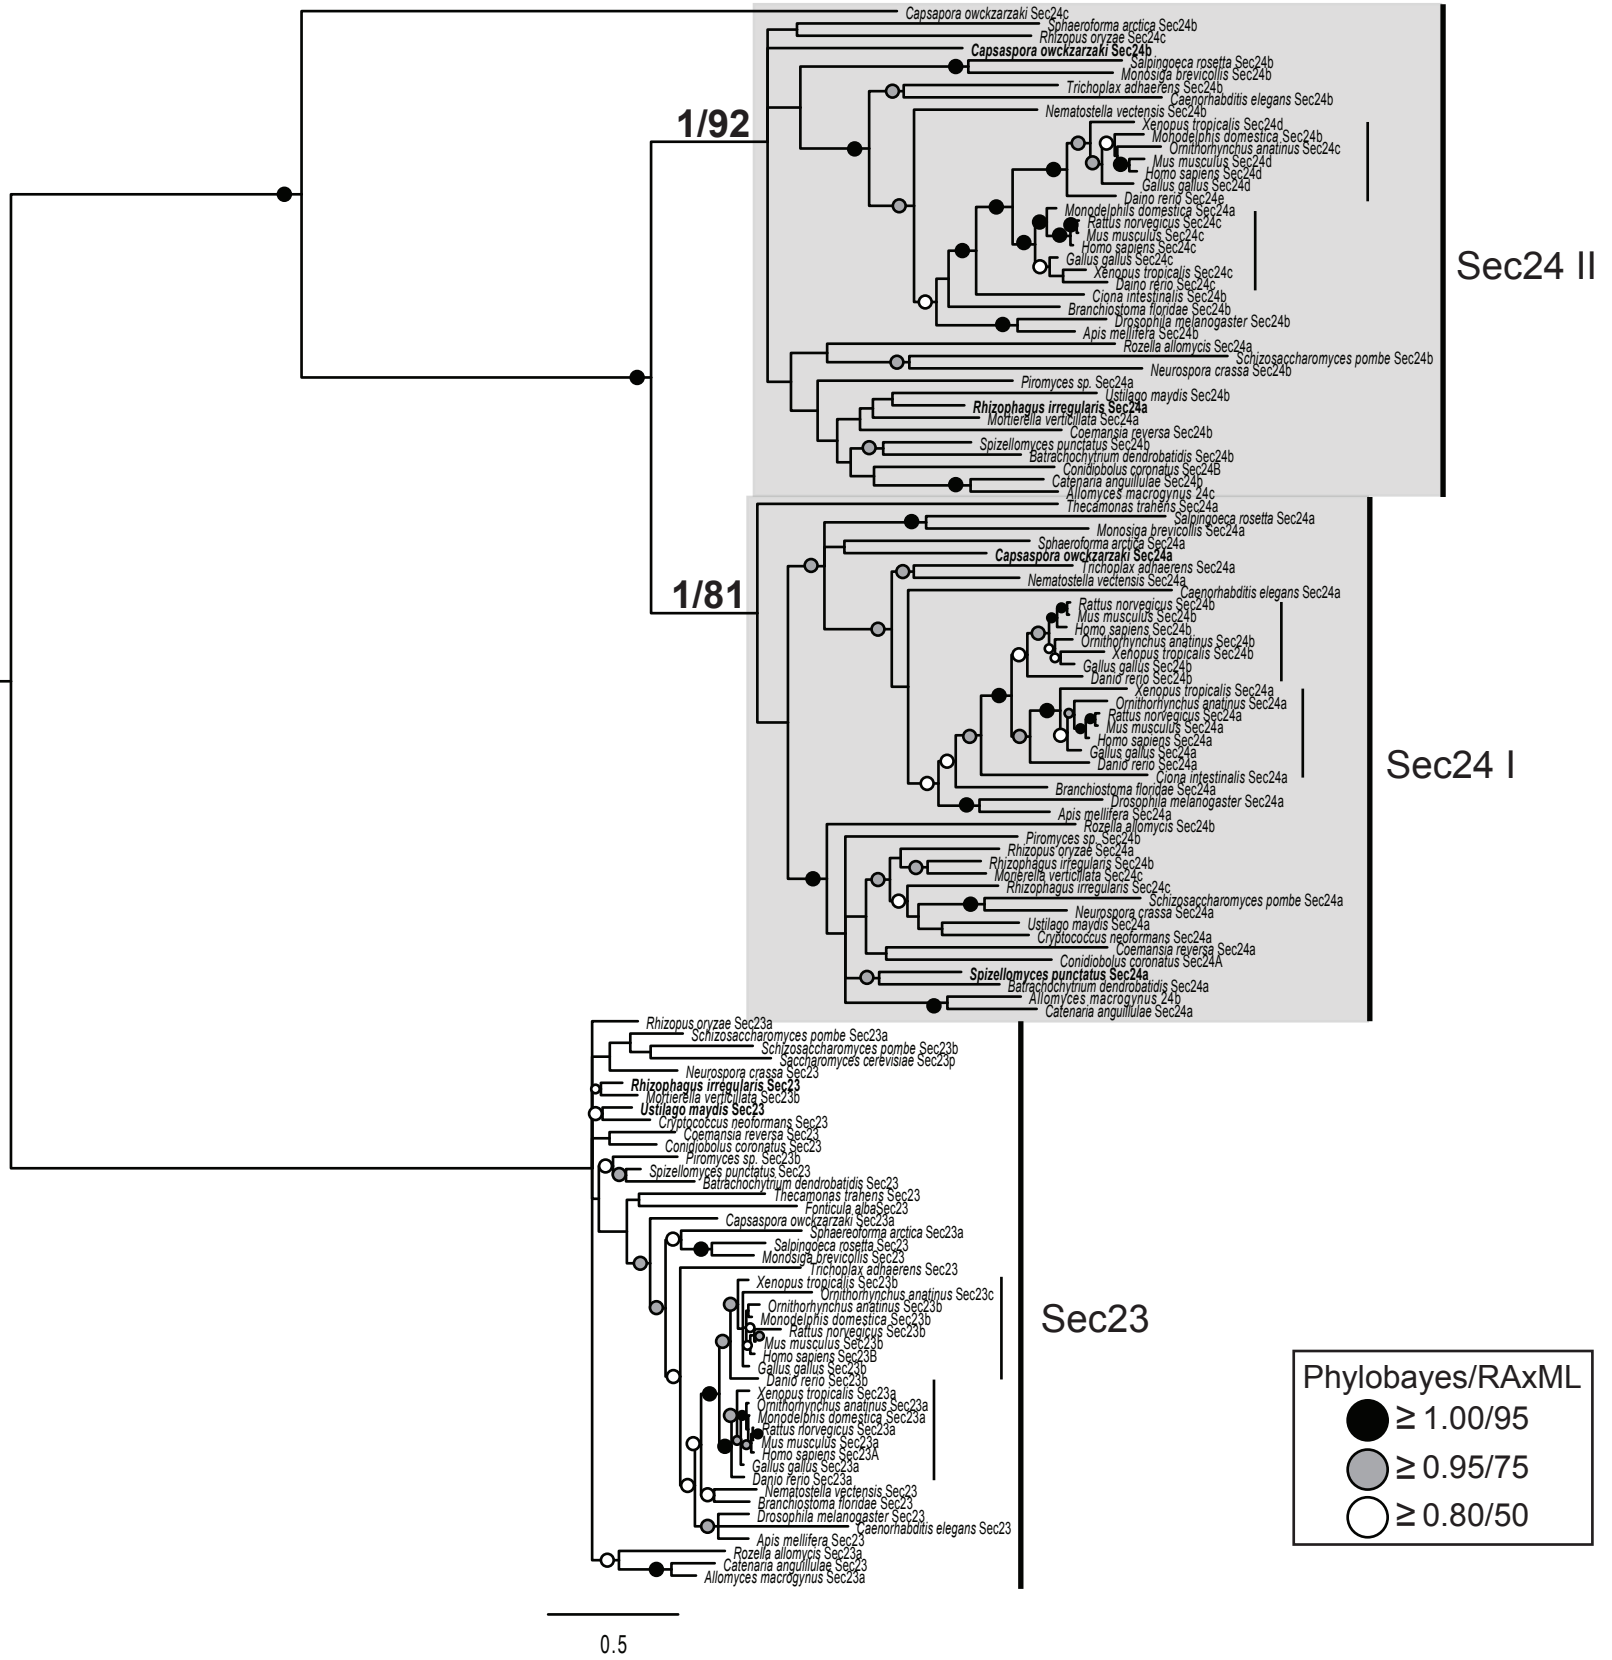

Schlacht and Dacks Figure S17

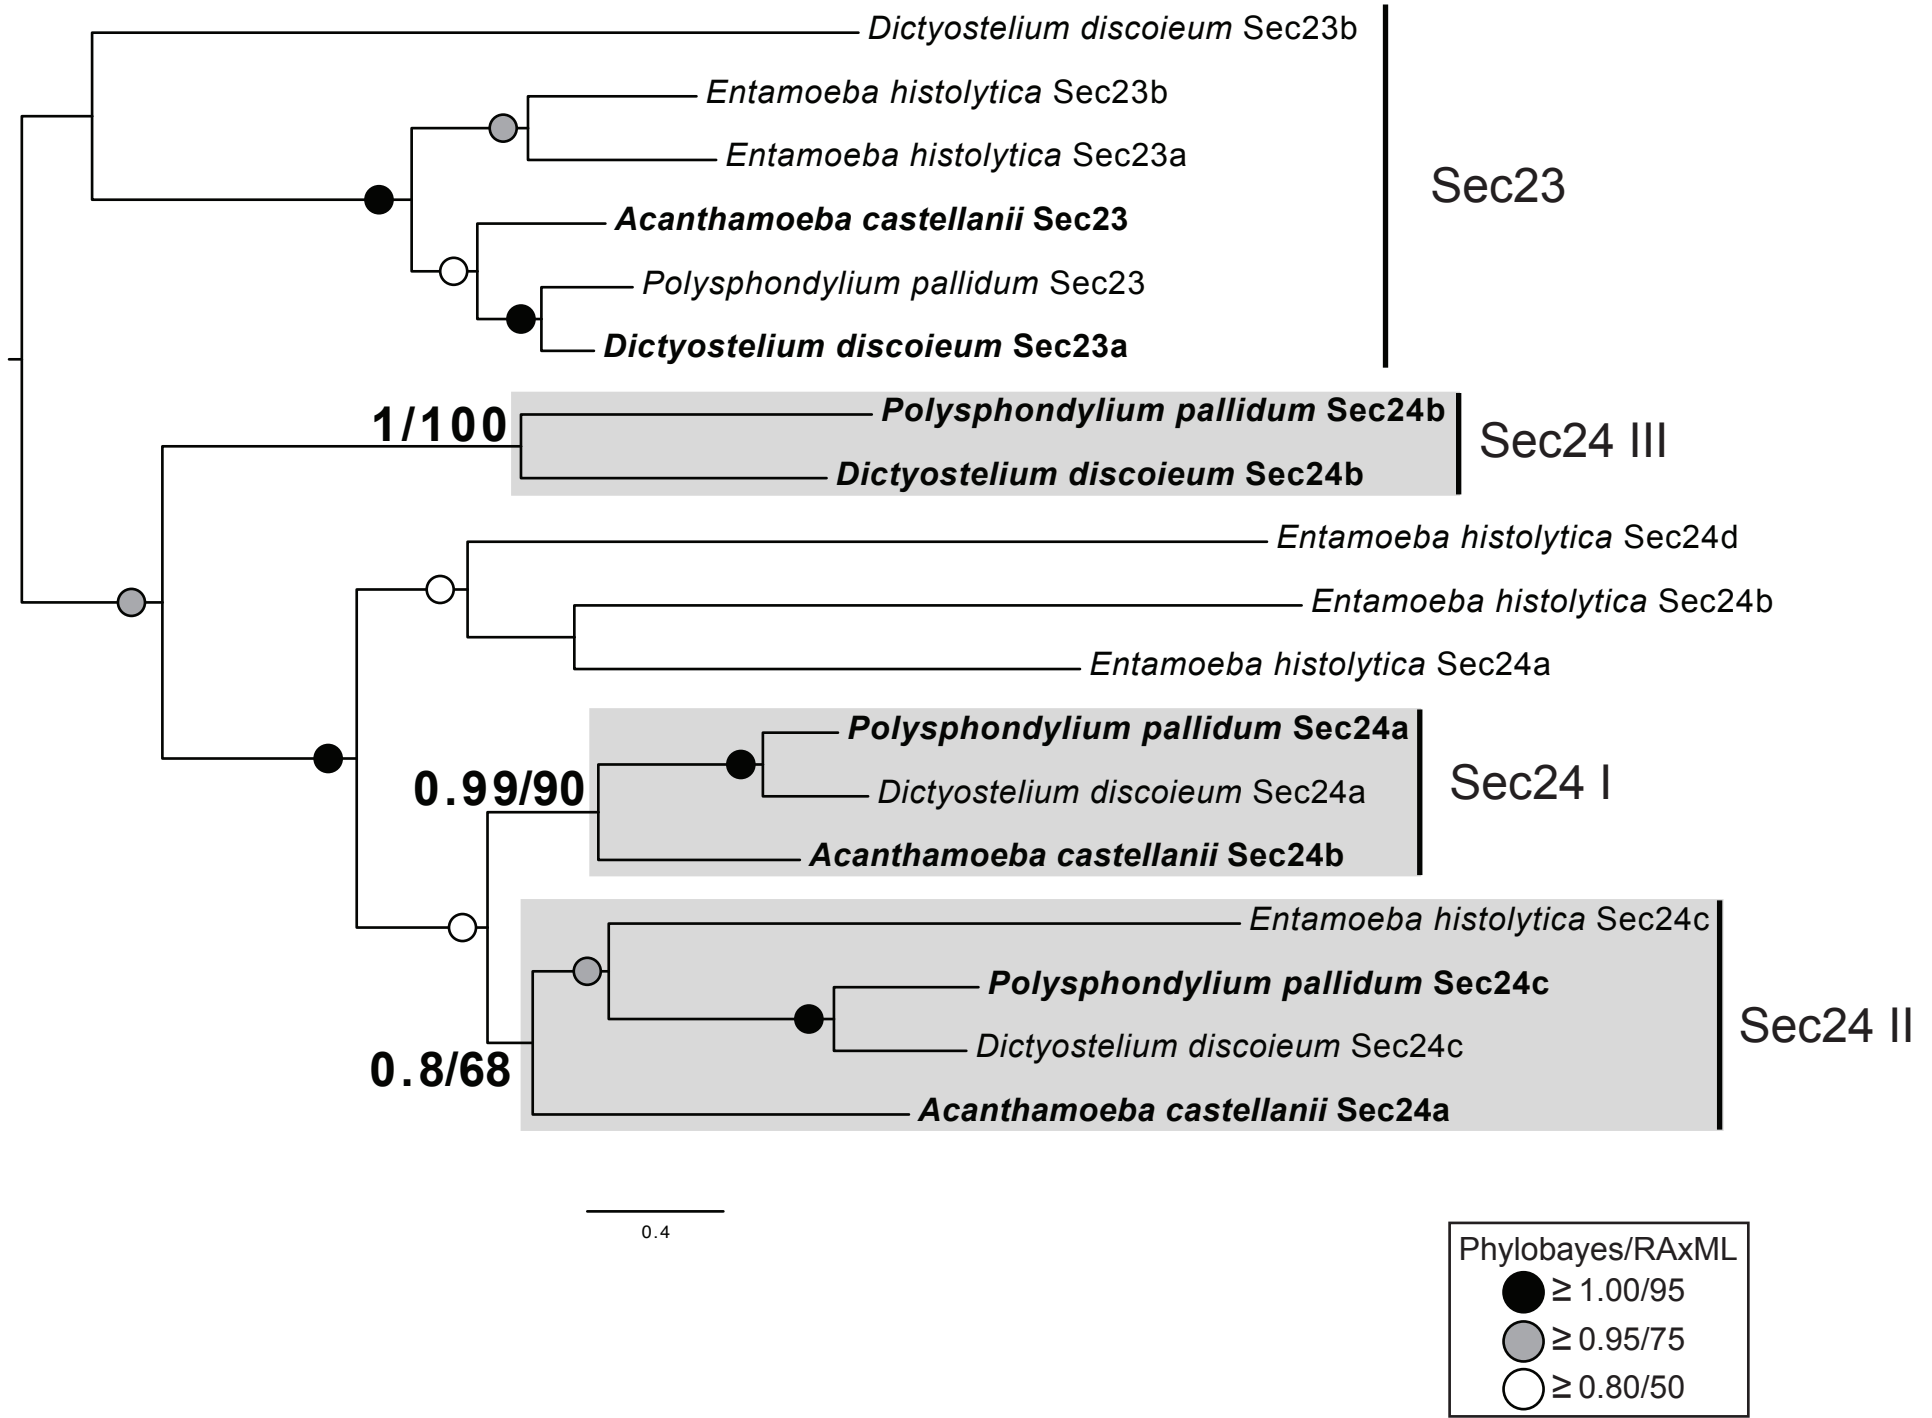



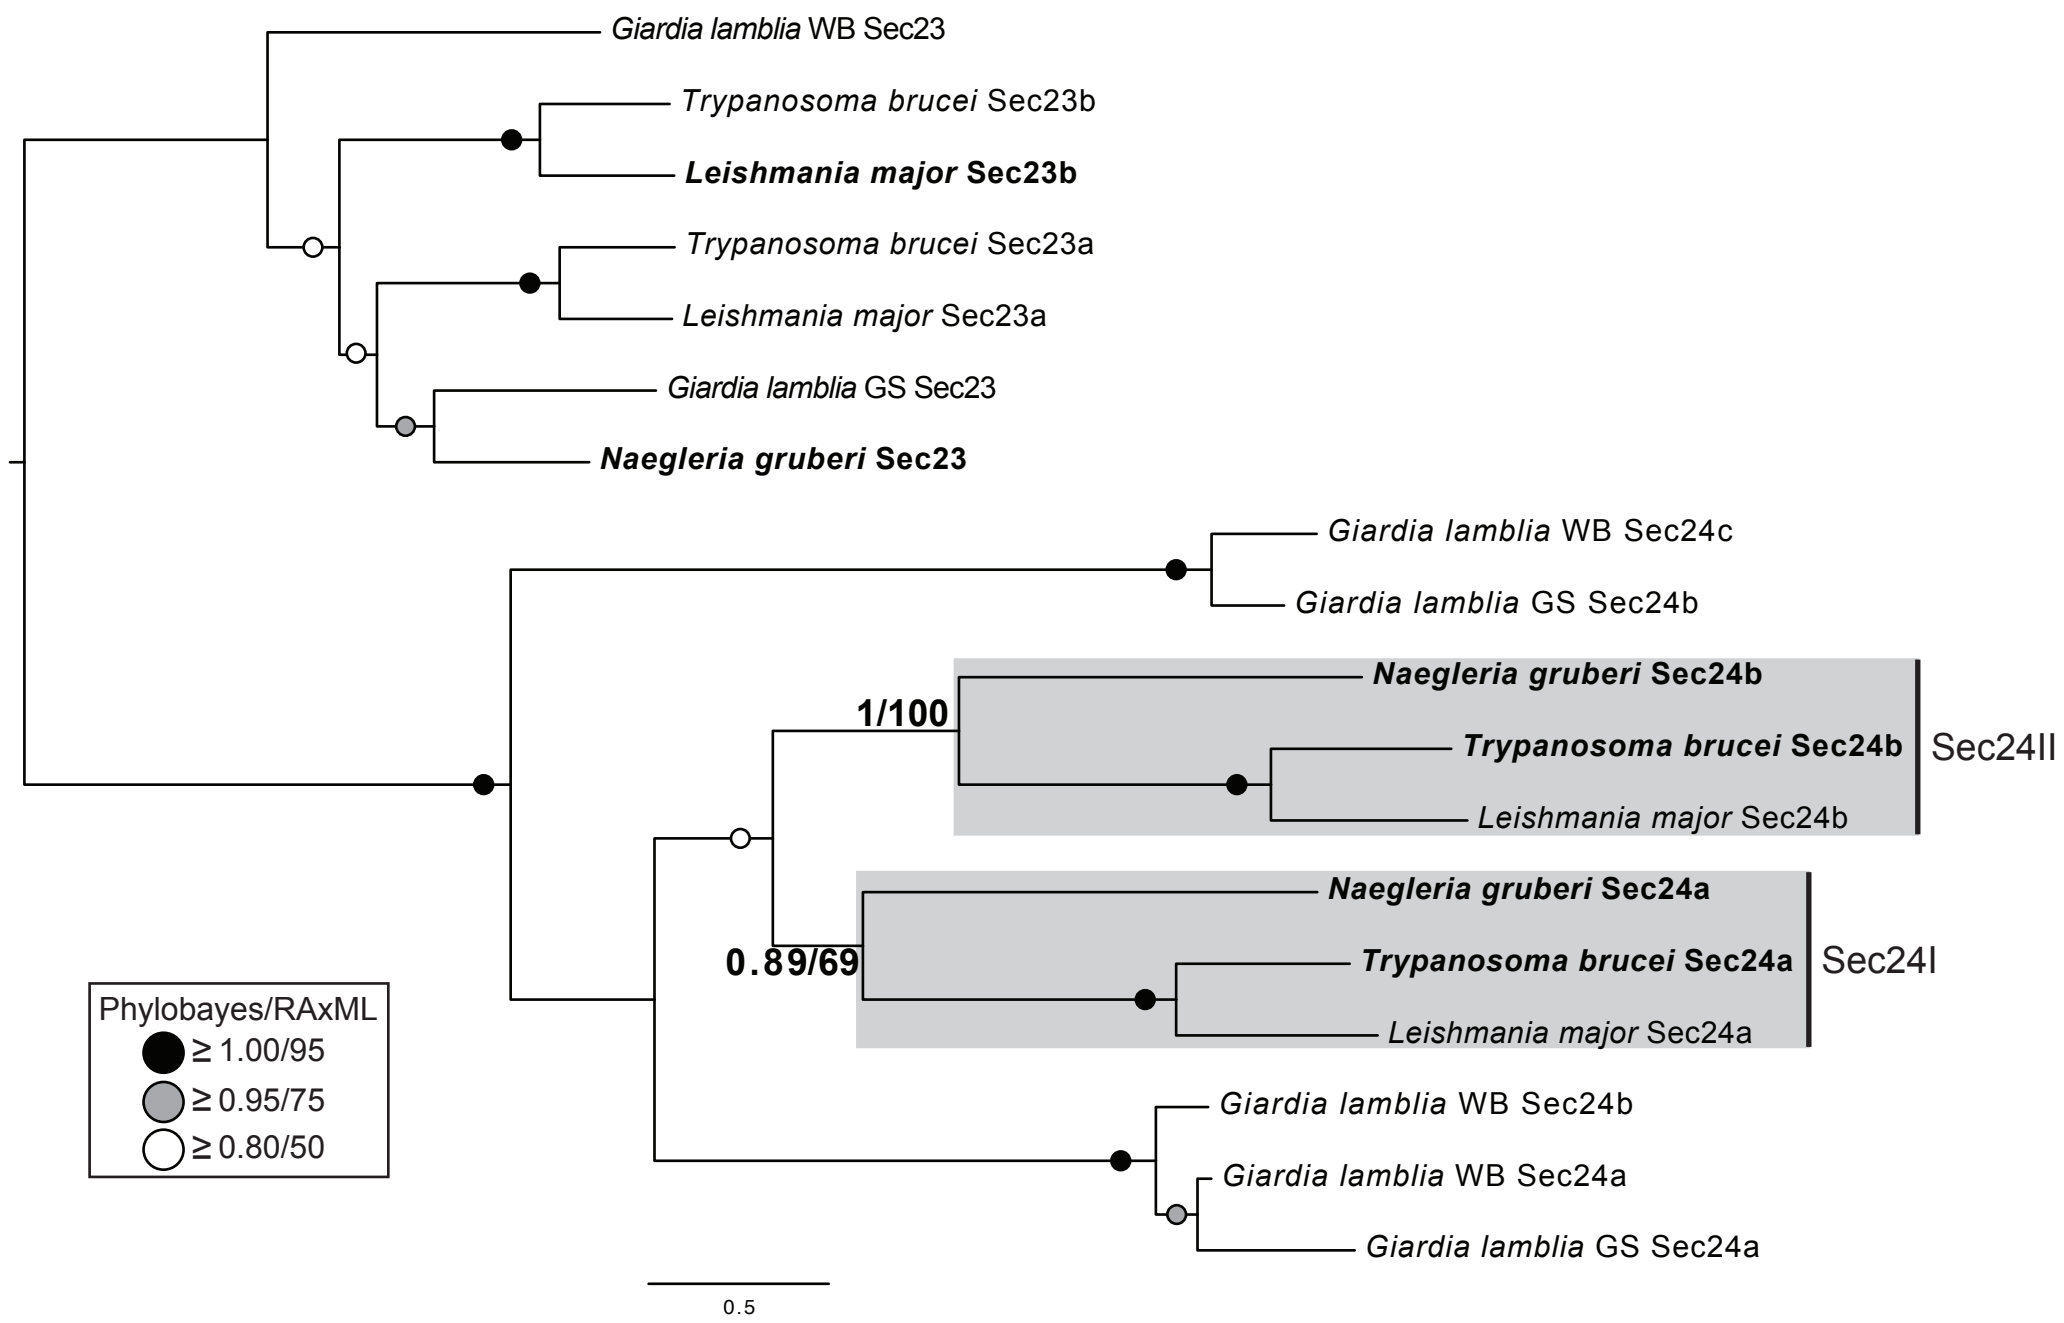

Schlacht and Dacks Figure S19

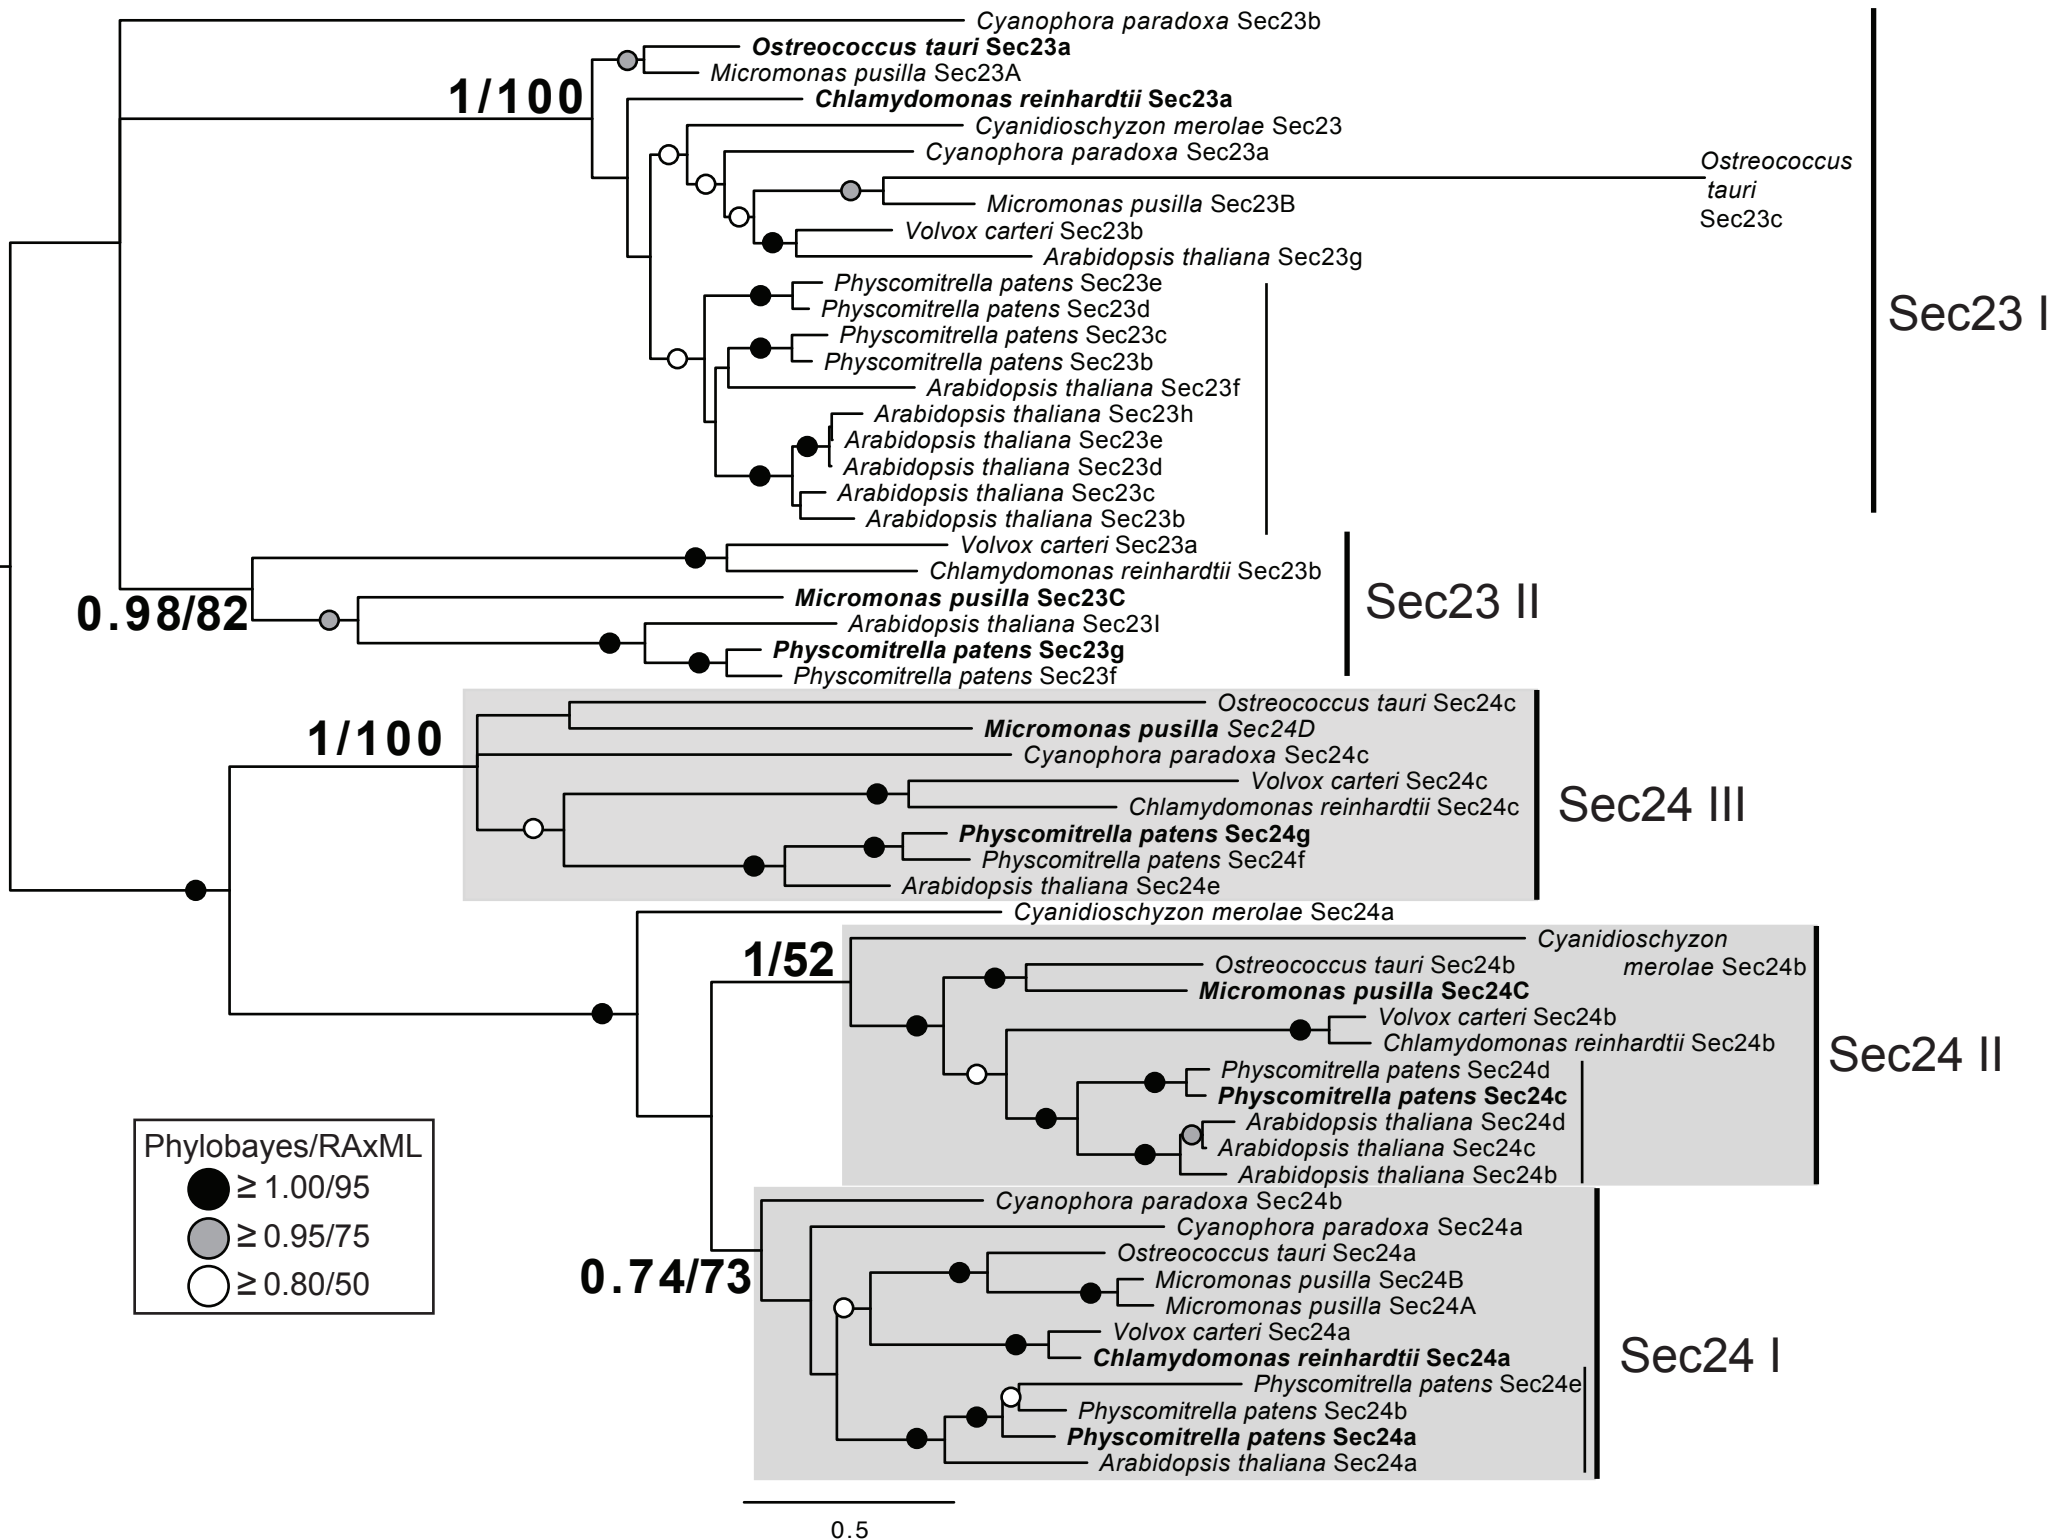

Schlacht and Dacks Figure S20

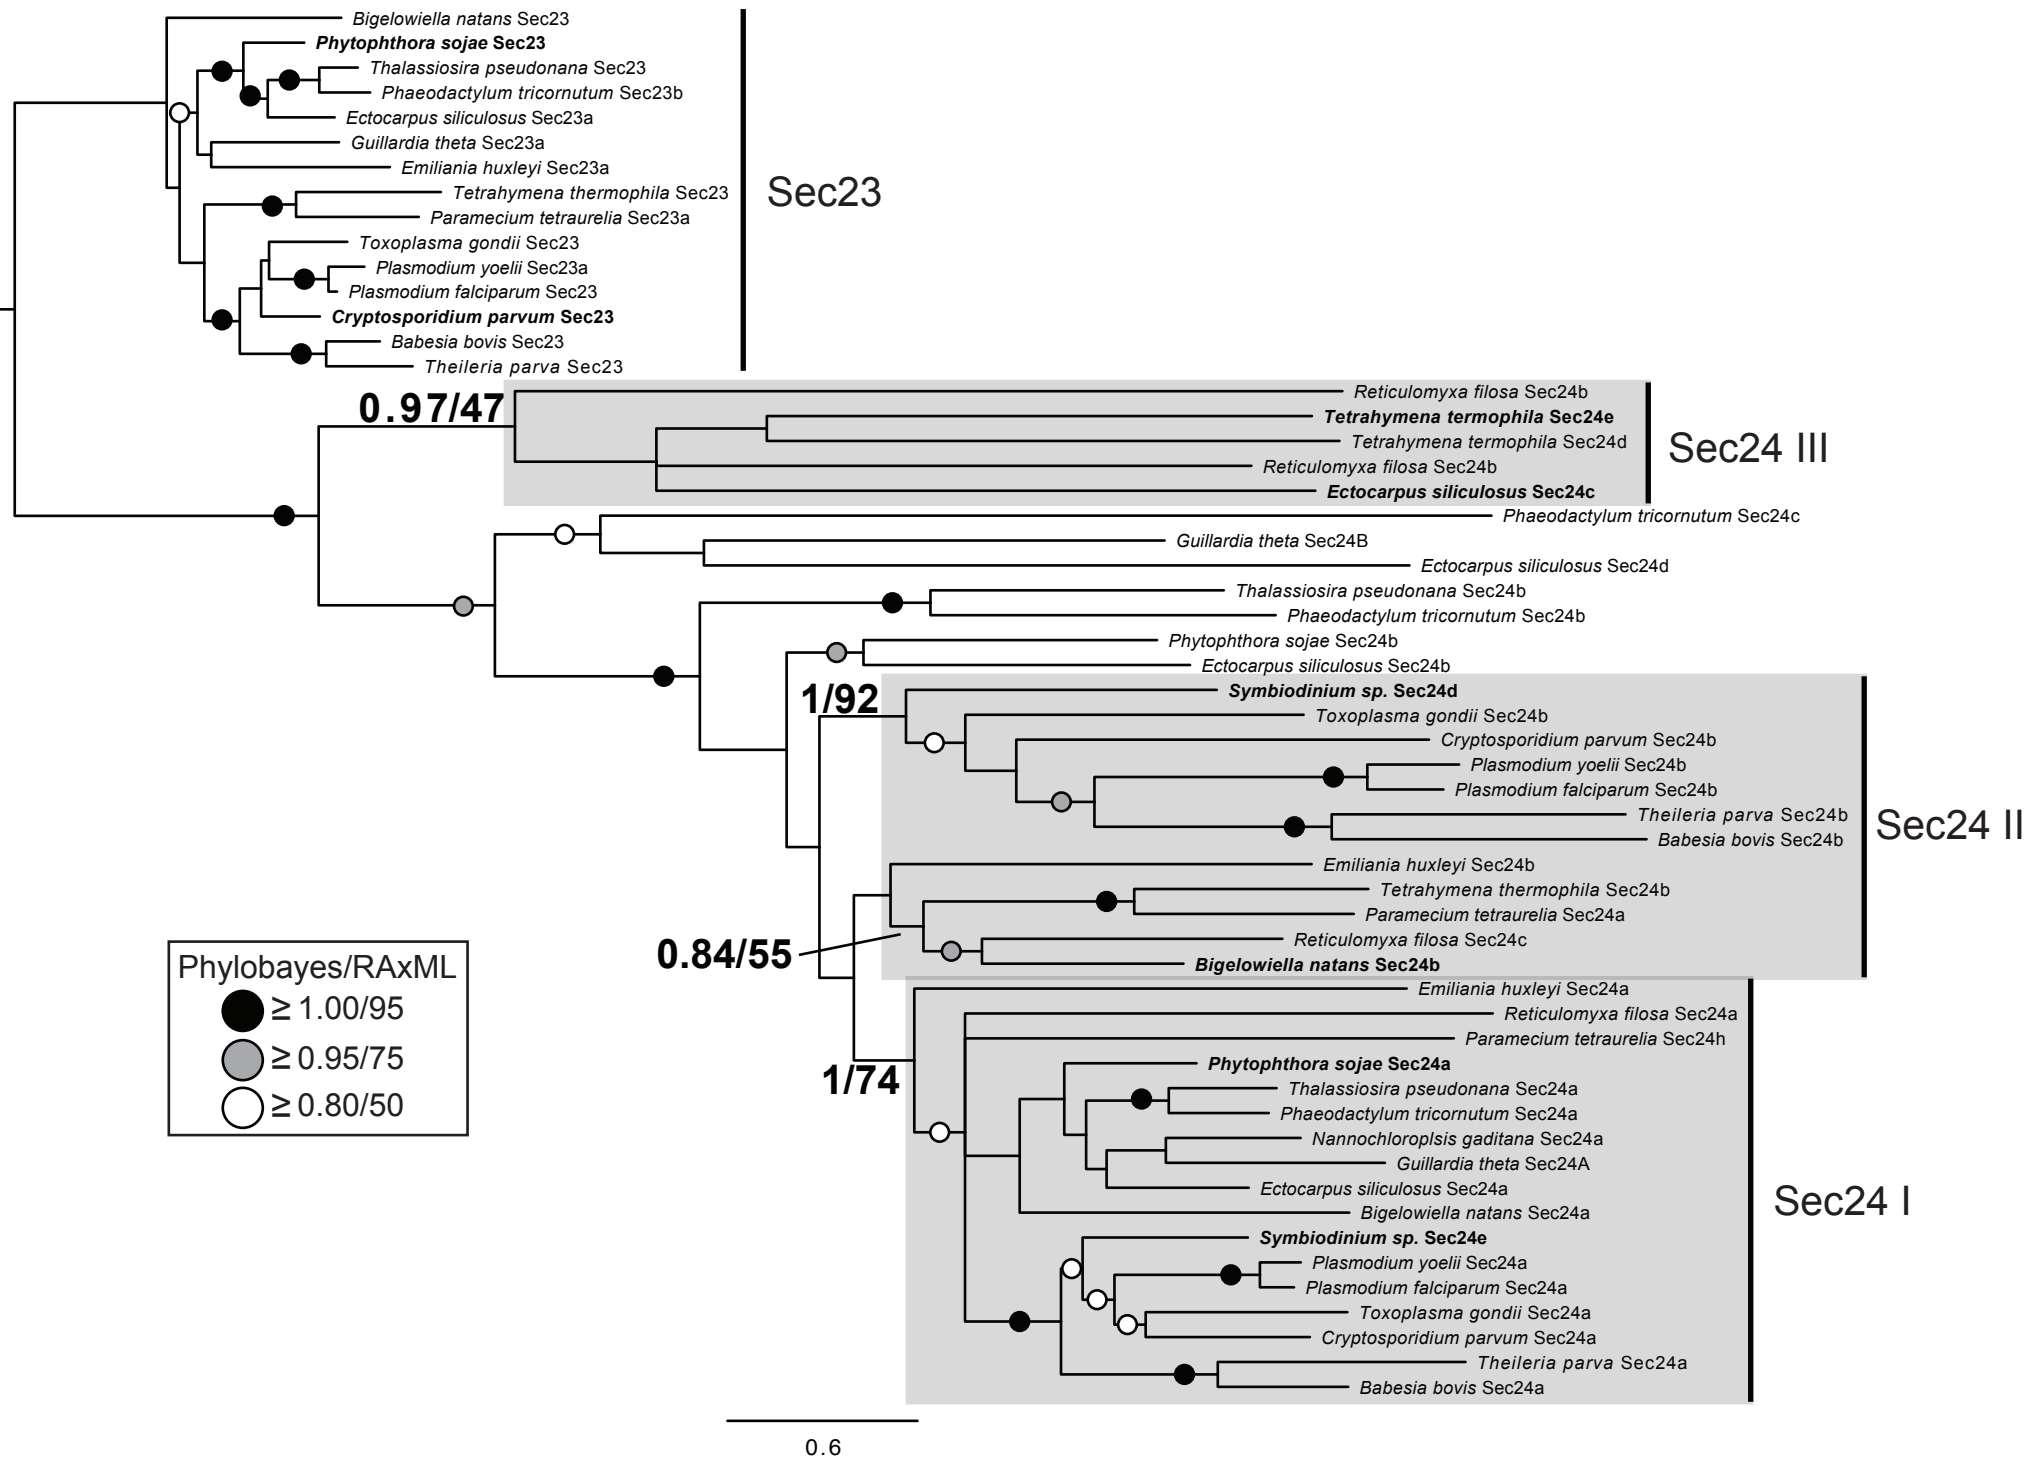

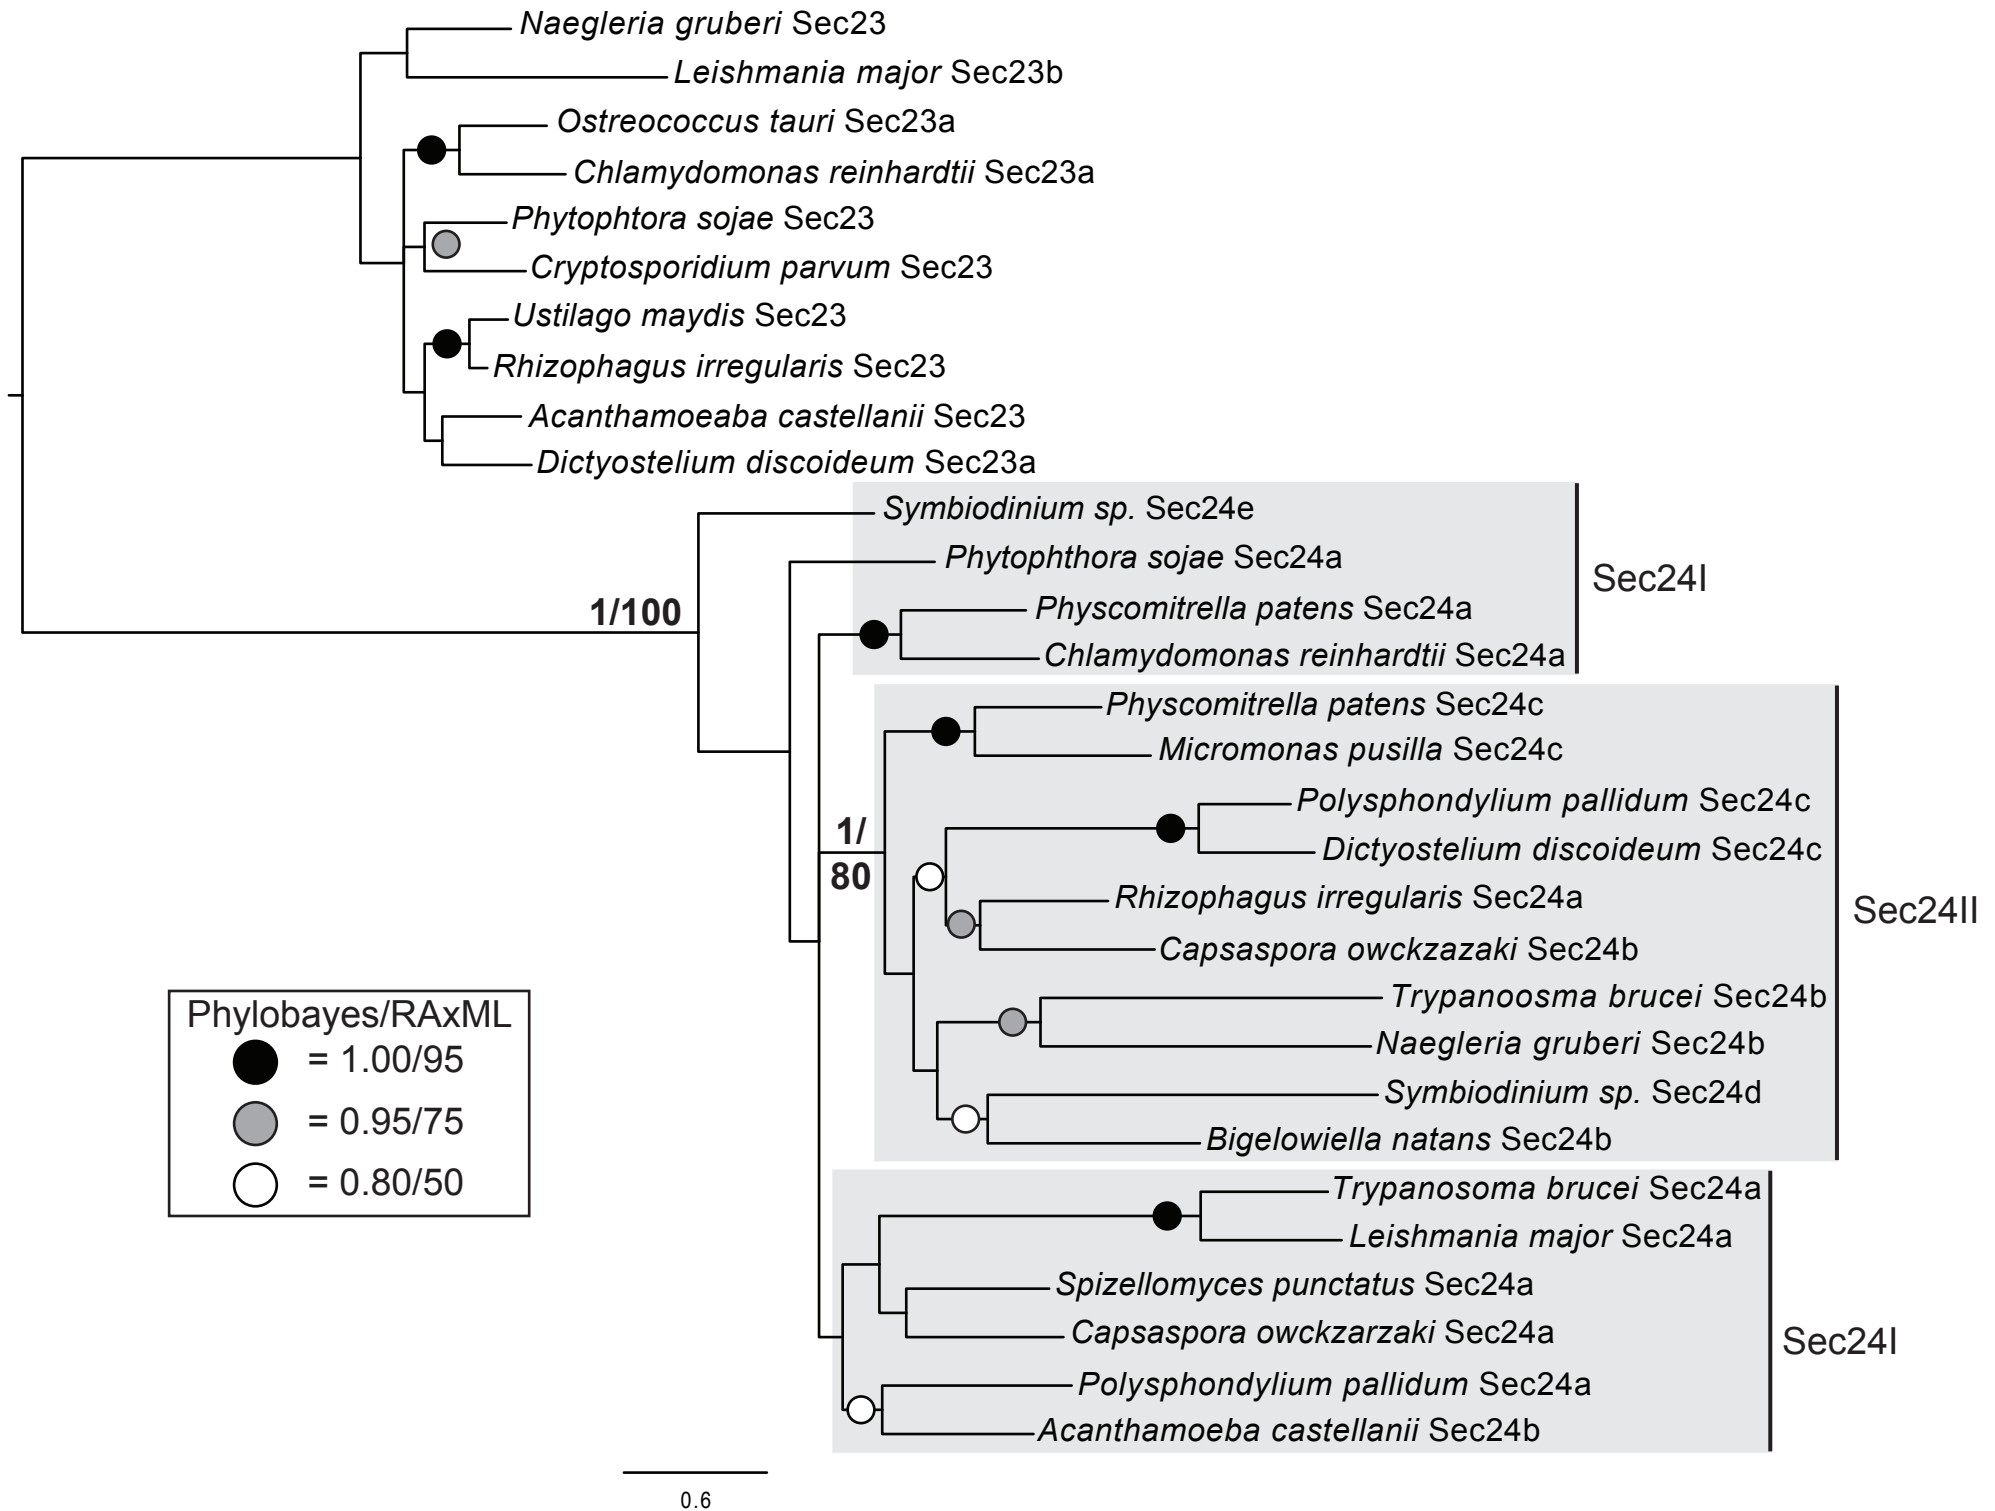

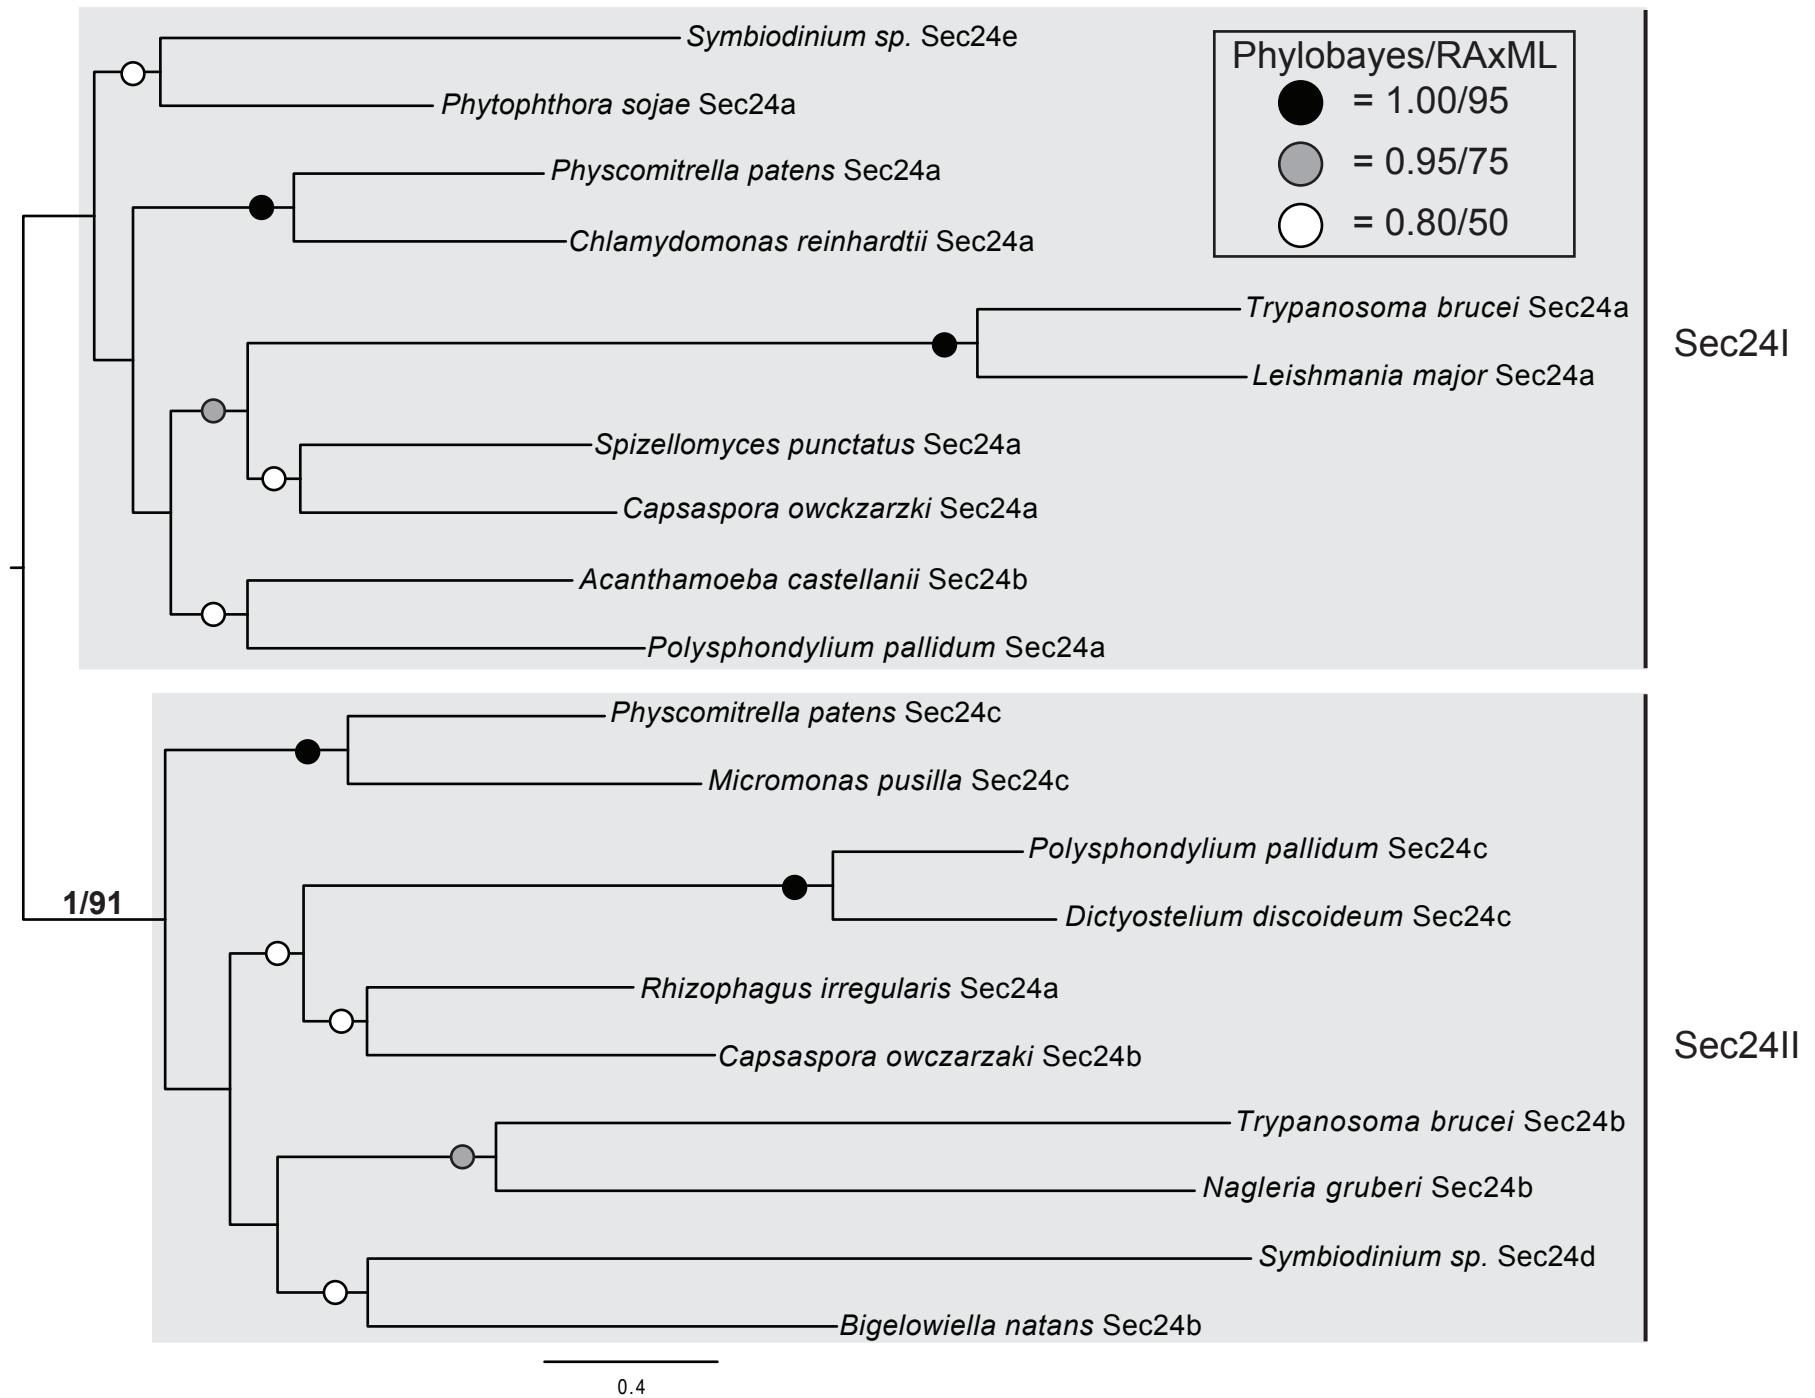

Schlacht and Dacks Figure S23



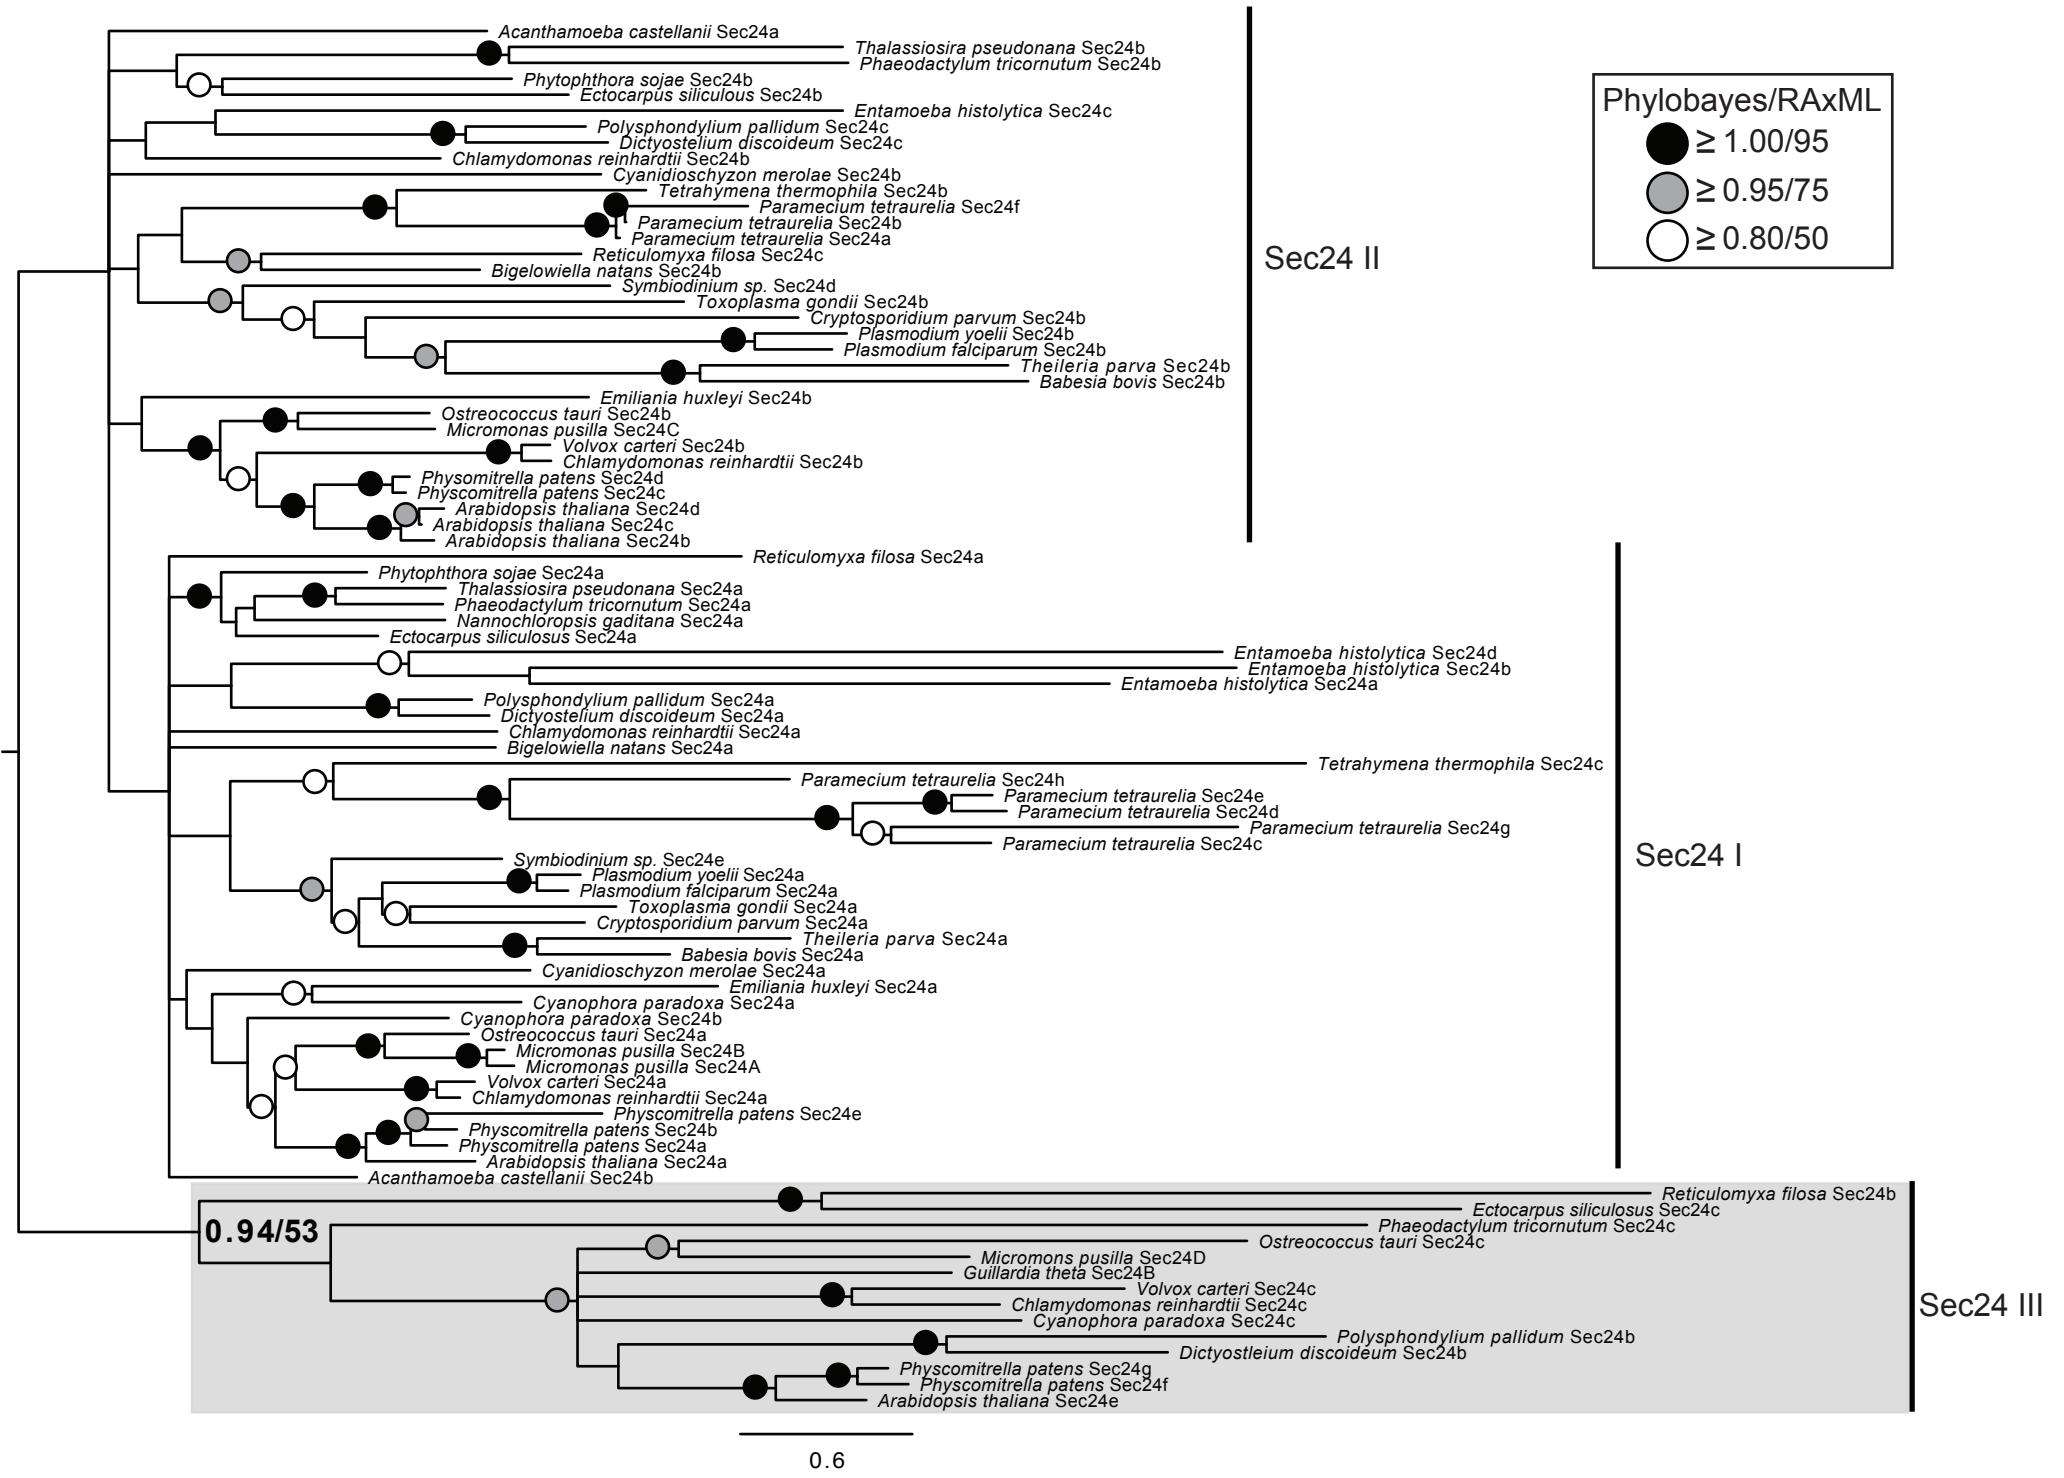

Schlacht and Dacks Figure S24
